# Supplementary material
Source: ML conference proceedings conference paper supplement (https://proceedings.mlr.press/v80/sun18c.html)
Supplement: Supplementary file [file sun18c-supp.pdf]

# Supplementary Material to “Graphical Nonconvex Optimization via an Adaptive Convex Relaxation”

## Abstract

This supplementary material collects proofs for the main theoretical results in the main text and additional technical lemmas. The proofs of Proposition 3.4, Theorems 3.5 and 3.6 are collected in Section A. Section B provides the proof for Theorem 3.8. Proofs related to semiparametric graphical models are given in Section C. Various concentration inequalities and preliminary lemmas are postponed to Sections D and E, respectively.

## A. Rate of Convergence in Frobenius Norm

This section presents an upper bound for the adaptive estimator  $\widehat{\Psi}^{(\ell)}$  in Frobenius norm, which in turn establishes the scaling conditions needed to achieve the optimal spectral norm convergence rate.

### A.1. Proofs of Proposition 3.4, Theorems 3.5 and 3.6

In this section, we collect the proofs for Proposition 3.4, Theorems 3.5 and 3.6.

In order to suppress the noise at the  $\ell$ th step, it is necessary to control  $\min_{(i,j) \in S} |\widehat{\Psi}_{ij}^{(\ell-1)}|$  in high dimensions. For this, we construct an entropy set,  $\mathcal{E}_\ell$ , of  $S$  and analyze the magnitude of  $\|\lambda_{\mathcal{E}_\ell}^{(\ell-1)}\|_{\min}$ . The entropy set at the  $\ell$ -th stage,  $\mathcal{E}_\ell$ , is defined as

$$\mathcal{E}_\ell = \left\{ (i, j) : (i, j) \in S \text{ or } \lambda_{ij}^{(\ell-1)} < \lambda w(u), \text{ for } u = 2(32\|\Psi^*\|_2^2 + \|\Sigma^*\|_\infty^2 \vee 1)\lambda \right\}. \quad (\text{A.1})$$

Thus the constant in Assumption 3.3 is  $c = 2(32\|\Psi^*\|_2^2 + \|\Sigma^*\|_\infty^2 \vee 1)$ . Then it can be seen that  $S \subseteq \mathcal{E}_\ell$ , and thus  $\mathcal{E}_\ell$  is an entropy set of  $S$  for any  $\ell \geq 1$ . Proposition 3.4 follows from a slightly more general result below, which establishes rate of convergence for the one-step estimator of sparse inverse correlation matrix  $\widehat{\Psi}^{(1)}$ .

**Proposition A.1 (One-step Estimator).** Assume that assumption 3.1 holds. Suppose  $8\|\Psi^*\|_2^2 \lambda \sqrt{s} < 1$ . Take  $\lambda$  such that  $\lambda \asymp \sqrt{(\log d)/n}$  and suppose  $n \gtrsim \log d$ . Then with probability at least  $1 - 8/d$ ,  $\widehat{\Psi}^{(1)}$  must satisfy

$$\|\widehat{\Psi}^{(1)} - \Psi^*\|_F \leq C\|\Psi^*\|_2^2 \sqrt{\frac{s \log d}{n}}.$$

*Proof of Proposition A.1.* Define the event  $\mathcal{J} = \{\|\widehat{\mathbf{C}} - \mathbf{C}^*\|_{\max} \leq \lambda/2\}$ . Then in the event  $\mathcal{J}$ , by applying Lemma A.4 and taking  $\mathcal{E} = S$ , we obtain  $\|\widehat{\Psi}^{(1)} - \Psi^*\|_F \leq 4\|\Psi^*\|_2^2 \cdot \lambda \sqrt{s}$ . If we further take  $\lambda = \sqrt{3c_2^{-1} \sqrt{(\log d)/n}} \asymp \sqrt{(\log d)/n}$ , then by Lemma D.5, we have event  $\mathcal{J}$  hold with probability at least  $1 - 8d^{-1}$ . The result follows by plugging the choice of  $\lambda$ .  $\square$

Theorems 3.5 and 3.6 follow from a slightly more general result below, which characterizes the rate of convergence of  $\widehat{\Psi}^{(\ell)}$  in Frobenius norm and that of  $\widehat{\Theta}^{(T)}$  in spectral norm.  $\square$

**Theorem A.2.** Suppose that  $8\|\Psi^*\|_2^2\lambda\sqrt{s} < 1$ . Take  $\lambda$  such that  $\lambda \asymp \sqrt{\log d/n}$ . Under Assumptions 3.1, 3.2 and 3.3, with probability at least  $1 - 8d^{-1}$ ,  $\widehat{\Psi}^{(\ell)}$  satisfies

$$\|\widehat{\Psi}^{(\ell)} - \Psi^*\|_F \leq \underbrace{8\|\Psi^*\|_2^2\|\nabla\mathcal{L}(\Psi^*)_S\|_F}_{\text{Optimal Rate}} + \underbrace{\frac{1}{2}\|\widehat{\Psi}^{(\ell-1)} - \Psi^*\|_F}_{\text{Contraction}}, \quad 1 \leq \ell \leq T.$$

Moreover, if that  $T \gtrsim \log(\lambda\sqrt{n})$ , we have  $\|\widehat{\Psi}^{(T)} - \Psi^*\|_F = \mathcal{O}_{\mathbb{P}}(\|\Psi^*\|_2^2\sqrt{s/n})$ , and

$$\|\widetilde{\Theta}^{(T)} - \Theta^*\|_2 = \mathcal{O}_{\mathbb{P}}\left(\frac{\sigma_{\max}^3\|\Psi^*\|_2}{\sigma_{\min}^3}\sqrt{\frac{\log d}{n}}\sqrt{\frac{\|\Psi^*\|_2^2}{\sigma_{\min}^2}}\sqrt{\frac{s}{n}}\right).$$

*Proof of Theorem A.2.* Under the conditions of the theorem, combining Proposition A.7 and Lemma D.5, we obtain the following contraction property of the solutions,  $\{\widehat{\Psi}^{(\ell)}\}_{\ell=1}^T$ ,

$$\|\widehat{\Psi}^{(\ell)} - \Psi^*\|_F \leq 4\|\Psi^*\|_2^2\|\nabla\mathcal{L}(\Psi^*)_S\|_F + \frac{1}{2}\|\widehat{\Psi}^{(\ell-1)} - \Psi^*\|_F.$$

Next, we introduce an inequality by induction analysis. Specifically, if  $a_n \leq a_0 + \alpha a_{n-1}$ ,  $\forall n \geq 2$  and  $0 \leq \alpha < 1$ , then

$$a_n \leq a_0 \frac{1 - \alpha^{n-1}}{1 - \alpha} + \alpha^{n-1} a_1.$$

Taking  $a_0 = 4\|\Psi^*\|_2^2\|\nabla\mathcal{L}(\Psi^*)_S\|_F$ , we obtain that  $\|\widehat{\Psi}^{(\ell)} - \Psi^*\|_F \leq 8\|\Psi^*\|_2^2\|\nabla\mathcal{L}(\Psi^*)_S\|_F + (1/2)^{\ell-1}\|\widehat{\Psi}^{(1)} - \Psi^*\|_F$ . In the sequel, we bound  $\|\nabla\mathcal{L}(\Psi^*)_S\|_F$  and  $\|\widehat{\Psi}^{(1)} - \Psi^*\|_F$ , respectively. By Proposition A.1, we have  $\|\widehat{\Psi}^{(1)} - \Psi^*\|_F \lesssim 8\|\Psi^*\|_2^2\lambda\sqrt{s}$ . Moreover, if we let  $T \geq \log(\lambda\sqrt{n})/\log 2 \gtrsim \log(\lambda\sqrt{n})$ , then  $(1/2)^{T-1}\|\widehat{\Psi}^{(1)} - \Psi^*\|_F \leq 16\|\Psi^*\|_2^2 \cdot \sqrt{s/n}$ . On the other side, we have  $\|\nabla\mathcal{L}(\Psi^*)_S\|_F = \mathcal{O}_{\mathbb{P}}(\|\Psi^*\|_2^2 \cdot \sqrt{s/n})$ , which follows from Lemma D.4. Therefore, combining the above results, we have

$$\|\widehat{\Psi}^{(T)} - \Psi^*\|_F = \mathcal{O}_{\mathbb{P}}(\|\Psi^*\|_2^2\sqrt{s/n}).$$

To achieve the statistical rate for  $\|\widetilde{\Theta}^{(T)} - \Theta^*\|_2$ , we apply Lemma E.3 and obtain that

$$\begin{aligned} \|\widetilde{\Theta}^{(T)} - \Theta^*\|_2 &= \|(\widehat{\mathbf{W}}^{-1} - \mathbf{W}^{-1})(\widehat{\Psi}^{(T)} - \Psi^*)(\widehat{\mathbf{W}}^{-1} - \mathbf{W}^{-1})\|_2 + \|(\widehat{\mathbf{W}}^{-1} - \mathbf{W}^{-1})\widehat{\Psi}^{(T)}\mathbf{W}^{-1}\|_2 \\ &\quad + \|(\widehat{\mathbf{W}}^{-1} - \mathbf{W}^{-1})\Psi^*\widehat{\mathbf{W}}^{-1}\|_2 + \|\widehat{\mathbf{W}}^{-1}(\widehat{\Psi}^{(T)} - \Psi^*)\mathbf{W}^{-1}\|_2 \\ &\leq \underbrace{\|\widehat{\mathbf{W}}^{-1} - \mathbf{W}^{-1}\|_2^2\|\widehat{\Psi}^{(T)} - \Psi^*\|_2}_{\text{(R1)}} + \underbrace{\|\widehat{\mathbf{W}}^{-1} - \mathbf{W}^{-1}\|_2\|\widehat{\Psi}^{(T)}\|_2\|\mathbf{W}^{-1}\|_2}_{\text{(R2)}} \\ &\quad + \underbrace{\|\widehat{\mathbf{W}}^{-1} - \mathbf{W}^{-1}\|_2\|\Psi^*\|_2\|\widehat{\mathbf{W}}^{-1}\|_2}_{\text{(R3)}} + \underbrace{\|\widehat{\mathbf{W}}^{-1}\|_2\|\mathbf{W}^{-1}\|_2\|\widehat{\Psi}^{(T)} - \Psi^*\|_2}_{\text{(R4)}}. \end{aligned}$$

We now bound terms (R1) to (R4) respectively. Before we proceed, we apply Lemma D.2 and the union sum bound to obtain that, for any  $\varepsilon \geq 0$ ,

$$\mathbb{P}\left(\|\widehat{\mathbf{W}}^2 - \mathbf{W}^2\|_2 > \varepsilon \max_i \Sigma_{ii}^*\right) \leq d \cdot \exp\{-n \cdot C(\varepsilon)\} = \exp\{-n \cdot C(\varepsilon) + \log d\},$$

where  $C(\varepsilon) = 2^{-1}(\varepsilon - \log(1 + \varepsilon))$ . Suppose that  $0 \leq \varepsilon \leq 1/2$ , then we have  $-n \cdot C(\varepsilon) \leq -n \cdot \varepsilon^2/3$ . Further suppose that  $n \geq 36 \log d$  and take  $\varepsilon = 3\sqrt{(\log d)/n}$ , we obtain that  $-n \cdot C(\varepsilon) + \log d \leq 2 \log d$  and

$$\mathbb{P}\left(\|\widehat{\mathbf{W}}^2 - \mathbf{W}^2\|_2 > 3\sigma_{\max}^2 \cdot \sqrt{\frac{\log d}{n}}\right) \leq \frac{1}{d^2},$$

where we use the assumption that  $\max_i \Sigma_{ii}^* \leq \sigma_{\max}^2$ . Therefore, we have  $\|\widehat{\mathbf{W}}^2 - \mathbf{W}^2\|_2 = \mathcal{O}_{\mathbb{P}}(\sigma_{\max}^2 \cdot \sqrt{\log d/n})$ . Since  $\widehat{\mathbf{W}}^2$  and  $\mathbf{W}^2$  are diagonal and thus commutative. We note that, for any two event  $\mathcal{A}$  and  $\mathcal{B}$ ,  $\mathbb{P}(\mathcal{A}) = \mathbb{P}(\mathcal{A} \cap \mathcal{B}) + \mathbb{P}(\mathcal{A} \cap \mathcal{B}^c)$

holds. Therefore, for any  $M > 0$ , we have

$$\begin{aligned}
& \mathbb{P}\left(\|\widehat{\mathbf{W}}^{-1} - \mathbf{W}^{-1}\|_2 > M\sigma_{\max}^2\sqrt{\frac{\log d}{n}}\right) \\
& \leq \mathbb{P}\left(\|\widehat{\mathbf{W}}^{-1} - \mathbf{W}^{-1}\|_2 > M\sigma_{\max}^2\sqrt{\frac{\log d}{n}}, \right. \\
& \quad \left.\|\widehat{\mathbf{W}}^{-1} - \mathbf{W}^{-1}\|_2 \leq 2(\sqrt{2}+1)\|\mathbf{W}\|_2\lambda_{\min}^{-2}(\mathbf{W}^2)\|\widehat{\mathbf{W}}^2 - \mathbf{W}^2\|_2\right) \\
& + \mathbb{P}\left(\|\widehat{\mathbf{W}}^{-1} - \mathbf{W}^{-1}\|_2 > 2(\sqrt{2}+1)\|\mathbf{W}\|_2\lambda_{\min}^{-2}(\mathbf{W}^2)\|\widehat{\mathbf{W}}^2 - \mathbf{W}^2\|_2\right).
\end{aligned}$$

Further using Lemma E.7 yields that

$$\begin{aligned}
& \mathbb{P}\left(\|\widehat{\mathbf{W}}^{-1} - \mathbf{W}^{-1}\|_2 > M\sigma_{\max}^2\sqrt{\frac{\log d}{n}}\right) \\
& \leq \underbrace{\mathbb{P}\left(2(\sqrt{2}+1)\|\mathbf{W}\|_2\lambda_{\min}^{-2}(\mathbf{W}^2)\|\widehat{\mathbf{W}}^2 - \mathbf{W}^2\|_2 > M\sigma_{\max}^2\sqrt{\frac{\log d}{n}}\right)}_{(T1)} \\
& + \underbrace{\mathbb{P}\left(\|\widehat{\mathbf{W}}^2 - \mathbf{W}^2\|_2 > 2^{-1}\lambda_{\min}(\mathbf{W}^2)\right)}_{(T2)}.
\end{aligned}$$

By taking  $M = M_1 \cdot \|\mathbf{W}\|_2\lambda_{\min}^{-2}(\mathbf{W}^2) = M_1 \cdot \sigma_{\max}/\sigma_{\min}^4$  and letting  $M_1 \rightarrow 0$ , we get (T1)  $\rightarrow 0$ . Under the assumption that  $\sigma_{\max}^2/\sigma_{\min}^2 = O((n/\log d)^{1/3})$ , we have  $\sigma_{\max}^2/\sigma_{\min}^2 = o(\sqrt{n/\log d})$ , and thus (T2)  $\rightarrow 0$ . Therefore we obtain that  $\|\widehat{\mathbf{W}}^{-1} - \mathbf{W}^{-1}\|_2 = \mathcal{O}_{\mathbb{P}}(\sigma_{\min}^{-4}\sigma_{\max}^3\sqrt{(\log d)/n})$ . Similarly, we have the following facts:

$$\|\widehat{\Psi}^{(T)}\|_2 = \mathcal{O}_{\mathbb{P}}(\|\Psi^*\|_2), \quad \|\widehat{\mathbf{W}}^{-1}\|_2 = \lambda_{\min}^{-1}(\widehat{\mathbf{W}}) = \mathcal{O}_{\mathbb{P}}(\sigma_{\min}^{-1}), \quad \text{and} \quad \|\mathbf{W}^{-1}\|_2 = \sigma_{\min}^{-1}.$$

Applying the above results to the terms (R1)-(R4). we obtain that

$$\begin{aligned}
(R1) &= \mathcal{O}_{\mathbb{P}}\left(\sigma_{\min}^{-2}\|\Psi^*\|_2^2\sqrt{\frac{s}{n}} \cdot \frac{\sigma_{\max}^6}{\sigma_{\min}^6}\frac{\log d}{n}\right) = \mathcal{O}_{\mathbb{P}}\left(\sigma_{\min}^{-2}\|\Psi^*\|_2^2\sqrt{\frac{s}{n}}\right), \\
(R2) &= (R3) = \mathcal{O}_{\mathbb{P}}\left(\frac{\sigma_{\max}^3}{\sigma_{\min}^3}\|\Psi^*\|_2\sqrt{\frac{\log d}{n}}\right), \quad (R4) = \mathcal{O}_{\mathbb{P}}\left(\sigma_{\min}^{-2}\|\Psi^*\|_2^2\sqrt{\frac{s}{n}}\right).
\end{aligned}$$

Therefore, by combining the rate for terms (R1)-(R4), we obtain the final result.  $\square$

## A.2. Technical Lemmas

Define the symmetrized Bregman divergence for the loss function  $\mathcal{L}(\cdot)$  as  $D_{\mathcal{L}}^s(\Theta, \Theta^*) = \langle \nabla\mathcal{L}(\Theta) - \nabla\mathcal{L}(\Theta^*), \Theta - \Theta^* \rangle$ . For any matrix  $\mathbf{A} \in \mathbb{R}^{d \times d}$ , let  $\mathbf{A}_- \in \mathbb{R}^{d \times d}$  be the off diagonal matrix of  $\mathbf{A}$  with diagonal entries equal to 0, and  $\mathbf{A}_+ = \mathbf{A} - \mathbf{A}_-$  be the diagonal matrix.

**Lemma A.3.** For the symmetrized Bregman divergence defined above, we have

$$D_{\mathcal{L}}^s(\Theta, \Theta^*) = \langle \nabla\mathcal{L}(\Theta) - \nabla\mathcal{L}(\Theta^*), \Theta - \Theta^* \rangle \geq (\|\Theta^*\|_2 + \|\Theta - \Theta^*\|_2)^{-2}\|\Theta - \Theta^*\|_F^2.$$

*Proof of Lemma A.3.* We use  $\text{vec}(\mathbf{A})$  to denote the vectorized form of any matrix  $\mathbf{A}$ . Then by the mean value theorem, there exists a  $\gamma \in [0, 1]$  such that,

$$\begin{aligned}
D_{\mathcal{L}}^s(\Theta, \Theta^*) &= \langle \nabla\mathcal{L}(\Theta) - \nabla\mathcal{L}(\Theta^*), \Theta - \Theta^* \rangle = \text{vec}(\Theta - \Theta^*)^T (\nabla^2\mathcal{L}(\Theta^* + \gamma\Delta)) \text{vec}(\Theta - \Theta^*) \\
&\geq \lambda_{\min}(\nabla^2\mathcal{L}(\Theta^* + \gamma\Delta))\|\Delta\|_F^2,
\end{aligned}$$

where  $\Delta = \Theta - \Theta^*$ . By standard properties of the Kronecker product and the Weyl's inequality (Horn and Johnson, 2012), we obtain that

$$\begin{aligned}\lambda_{\min}\left(\nabla^2\mathcal{L}(\Theta^* + \gamma\Delta)\right) &= \lambda_{\min}\left(\left((\Theta^* + \gamma\Delta) \otimes (\Theta^* + \gamma\Delta)\right)^{-1}\right) \\ &= \|\Theta^* + \gamma\Delta\|_2^{-2} \geq (\|\Theta^*\|_2 + \gamma\|\Delta\|_2)^{-2}.\end{aligned}$$

Finally, observing that  $\gamma \leq 1$ , we obtain

$$D_{\mathcal{L}}^s(\Theta, \Theta^*) = \langle \nabla\mathcal{L}(\Theta) - \nabla\mathcal{L}(\Theta^*), \Delta \rangle \geq (\|\Theta^*\|_2 + \|\Delta\|_2)^{-2} \|\Theta - \Theta^*\|_F^2.$$

Plugging the definition of  $\Delta$  obtains us the final bound.  $\square$

The following lemma characterizes an upper bound of  $\|\widehat{\Psi} - \Psi^*\|_F$  by using localized analysis.

**Lemma A.4.** Suppose  $8\|\Psi^*\|_2\lambda\sqrt{s} < 1$ . Take  $\mathcal{E}$  such that  $S \subseteq \mathcal{E}$  and  $|\mathcal{E}| \leq 2s$ . Further assume  $\|\lambda_{\mathcal{E}^c}\|_{\min} \geq \lambda/2 \geq \|\nabla\mathcal{L}(\Psi^*)\|_{\max}$ . Let  $\widehat{\Psi}$  be the solution to (B.4). Then  $\widehat{\Psi}$  must satisfy

$$\|\widehat{\Psi} - \Psi^*\|_F \leq 4\|\Psi^*\|_2^2 (\|\lambda_S\|_F + \|\nabla\mathcal{L}(\Psi^*)_{\mathcal{E}}\|_F) \leq 8\|\Psi^*\|_2^2 \lambda\sqrt{s}.$$

*Proof of Lemma A.4.* We start by introducing an extra local parameter  $r$  which satisfies  $8\|\Psi^*\|_2^2\lambda\sqrt{s} < r \leq \|\Psi^*\|_2$ . This is possible since  $\lambda\sqrt{|\mathcal{E}|} \leq \sqrt{2}\lambda\sqrt{s} \rightarrow 0$  and  $8\|\Psi^*\|_2\lambda\sqrt{s} < 1$  by assumption. Based on this local parameter  $r$ , we construct an intermediate estimator:  $\widetilde{\Psi} = \Psi^* + t \cdot (\widehat{\Psi} - \Psi^*)$ , where  $t$  is taken such that  $\|(\widetilde{\Psi} - \Psi^*)\|_F = r$ , if  $\|(\widehat{\Psi} - \Psi^*)\|_F > r$ ;  $t = 1$  otherwise. Applying Lemma A.3 with  $\Theta_1 = \widetilde{\Psi}$  and  $\Theta_2 = \Psi^*$  obtains us

$$\left(\|\Psi^*\|_2 + r\right)^{-2} \|\widetilde{\Psi} - \Psi^*\|_F^2 \leq \langle \nabla\mathcal{L}(\widetilde{\Psi}) - \nabla\mathcal{L}(\Psi^*), \widetilde{\Psi} - \Psi^* \rangle. \quad (\text{A.2})$$

To bound the right hand side of the above inequality, we use Lemma E.2 to obtain

$$D_{\mathcal{L}}^s(\widetilde{\Psi}, \Psi^*) \leq tD_{\mathcal{L}}^s(\widehat{\Psi}, \Psi^*) = t\langle \nabla\mathcal{L}(\widehat{\Psi}) - \nabla\mathcal{L}(\Psi^*), \widehat{\Psi} - \Psi^* \rangle. \quad (\text{A.3})$$

We note that the sub-differential of the norm  $\|\cdot\|_{1,\text{off}}$  evaluated at  $\Psi$  consists the set of all symmetric matrices  $\Gamma \in \mathbb{R}^{d \times d}$  such that  $\Gamma_{ij} = 0$  if  $i = j$ ;  $\Gamma_{ij} = \text{sign}(\Gamma_{ij})$  if  $i \neq j$  and  $\Psi_{ij} \neq 0$ ;  $\Gamma_{ij} \in [-1, +1]$  if  $i \neq j$  and  $\Psi_{ij} = 0$ , where  $\Psi_{ij}$  is the  $(i, j)$ -th entry of  $\Psi$ . Then by the Karush-Kuhn-Tucker conditions, there exists a  $\widehat{\Gamma} \in \partial\|\widehat{\Psi}\|_{1,\text{off}}$  such that  $\nabla\mathcal{L}(\widehat{\Psi}) + \lambda \odot \widehat{\Gamma} = \widehat{C} - \widehat{\Psi}^{-1} + \lambda \odot \widehat{\Gamma} = \mathbf{0}$ . Plugging (A.3) into (A.2) and adding the term  $\langle \lambda \odot \widehat{\Gamma}, \widehat{\Psi} - \Psi^* \rangle$  on both sides of (A.3), we obtain

$$\begin{aligned}\left(\|\Psi^*\|_2 + r\right)^{-2} \|\widetilde{\Psi} - \Psi^*\|_F^2 + t \underbrace{\langle \nabla\mathcal{L}(\Psi^*), \widehat{\Psi} - \Psi^* \rangle}_I + t \underbrace{\langle \lambda \odot \widehat{\Gamma}, \widehat{\Psi} - \Psi^* \rangle}_II \\ \leq t \underbrace{\langle \nabla\mathcal{L}(\widehat{\Psi}) + \lambda \odot \widehat{\Gamma}, \widehat{\Psi} - \Psi^* \rangle}_III.\end{aligned} \quad (\text{A.4})$$

Next, we bound terms I, II and III respectively. For a set  $\mathcal{E}$ , let  $\mathcal{E}^c$  denote its complement with respect to (w.r.t.) the full index set  $\{(i, j) : 1 \leq i, j \leq d\}$ . For term I, separating the support of  $\nabla\mathcal{L}(\Psi)$  and  $\widehat{\Psi} - \Psi^*$  to  $\mathcal{E} \cup \mathcal{D}$  and  $\mathcal{E}^c \setminus \mathcal{D}$ , in which  $\mathcal{D}$  is the set consisting of all diagonal elements, and then using the matrix Hölder inequality, we obtain

$$\begin{aligned}\langle \nabla\mathcal{L}(\Psi^*), \widehat{\Psi} - \Psi^* \rangle &= \langle (\nabla\mathcal{L}(\Psi^*))_{\mathcal{E} \cup \mathcal{D}}, (\widehat{\Psi} - \Psi^*)_{\mathcal{E} \cup \mathcal{D}} \rangle + \langle (\nabla\mathcal{L}(\Psi^*))_{\mathcal{E}^c \setminus \mathcal{D}}, (\widehat{\Psi} - \Psi^*)_{\mathcal{E}^c \setminus \mathcal{D}} \rangle \\ &\geq -\|(\nabla\mathcal{L}(\Psi^*))_{\mathcal{E} \cup \mathcal{D}}\|_F \|(\widehat{\Psi} - \Psi^*)_{\mathcal{E} \cup \mathcal{D}}\|_F \\ &\quad -\|(\nabla\mathcal{L}(\Psi^*))_{\mathcal{E}^c \setminus \mathcal{D}}\|_F \|(\widehat{\Psi} - \Psi^*)_{\mathcal{E}^c \setminus \mathcal{D}}\|_F.\end{aligned}$$

For term II, separating the support of  $(\lambda \odot \widehat{\Gamma})$  and  $(\widehat{\Psi} - \Psi^*)$  to  $S \cup \mathcal{D}$  and  $S^c \setminus \mathcal{D}$ , we obtain

$$\langle (\lambda \odot \widehat{\Gamma}), (\widehat{\Psi} - \Psi^*) \rangle = \langle (\lambda \odot \widehat{\Gamma})_{S \cup \mathcal{D}}, (\widehat{\Psi} - \Psi^*)_{S \cup \mathcal{D}} \rangle + \langle (\lambda \odot \widehat{\Gamma})_{S^c \setminus \mathcal{D}}, (\widehat{\Psi} - \Psi^*)_{S^c \setminus \mathcal{D}} \rangle. \quad (\text{A.5})$$

For the last term in the above equality, we have

$$\langle (\boldsymbol{\lambda} \odot \widehat{\boldsymbol{\Gamma}})_{S^c \setminus \mathcal{D}}, (\widehat{\boldsymbol{\Psi}} - \boldsymbol{\Psi}^*)_{S^c \setminus \mathcal{D}} \rangle = \langle \boldsymbol{\lambda}_{S^c \setminus \mathcal{D}}, |\widehat{\boldsymbol{\Psi}}_{S^c \setminus \mathcal{D}}| \rangle = \langle \boldsymbol{\lambda}_{S^c \setminus \mathcal{D}}, |(\widehat{\boldsymbol{\Psi}} - \boldsymbol{\Psi}^*)_{S^c \setminus \mathcal{D}}| \rangle. \quad (\text{A.6})$$

Plugging (A.6) into (A.5) and applying matrix Hölder inequality yields

$$\begin{aligned} \langle (\boldsymbol{\lambda} \odot \widehat{\boldsymbol{\Gamma}}, \widehat{\boldsymbol{\Psi}} - \boldsymbol{\Psi}^*) \rangle &= \langle (\boldsymbol{\lambda} \odot \widehat{\boldsymbol{\Gamma}})_{S \cup \mathcal{D}}, (\widehat{\boldsymbol{\Psi}} - \boldsymbol{\Psi}^*)_{S \cup \mathcal{D}} \rangle + \langle \boldsymbol{\lambda}_{S^c \setminus \mathcal{D}}, |(\widehat{\boldsymbol{\Psi}} - \boldsymbol{\Psi}^*)_{S^c \setminus \mathcal{D}}| \rangle \\ &= \langle (\boldsymbol{\lambda} \odot \widehat{\boldsymbol{\Gamma}})_S, (\widehat{\boldsymbol{\Psi}} - \boldsymbol{\Psi}^*)_S \rangle + \|\boldsymbol{\lambda}_{S^c \setminus \mathcal{D}}\|_F \|(\widehat{\boldsymbol{\Psi}} - \boldsymbol{\Psi}^*)_{S^c \setminus \mathcal{D}}\|_F \\ &\geq -\|\boldsymbol{\lambda}_S\|_F \|(\widehat{\boldsymbol{\Psi}} - \boldsymbol{\Psi}^*)_S\|_F + \|\boldsymbol{\lambda}_{\mathcal{E}^c \setminus \mathcal{D}}\|_F \|(\widehat{\boldsymbol{\Psi}} - \boldsymbol{\Psi}^*)_{\mathcal{E}^c \setminus \mathcal{D}}\|_F, \end{aligned}$$

where we use  $\boldsymbol{\lambda}_{\mathcal{D}} = \mathbf{0}$  in the second equality and  $\mathcal{E}^c \setminus \mathcal{D} \subseteq S^c \setminus \mathcal{D}$  in the last inequality. For term III, using the optimality condition, we have  $\text{III} = \langle \nabla \mathcal{L}(\widehat{\boldsymbol{\Psi}}) + \boldsymbol{\lambda} \odot \widehat{\boldsymbol{\Gamma}}, \widehat{\boldsymbol{\Psi}} - \boldsymbol{\Psi}^* \rangle = 0$ . Plugging the bounds for term I, II and III back into (A.4), we find that

$$\begin{aligned} (\|\boldsymbol{\Psi}^*\|_2 + r)^{-2} \|\widetilde{\boldsymbol{\Psi}} - \boldsymbol{\Psi}^*\|_F^2 + t(\|\boldsymbol{\lambda}_{\mathcal{E}^c \setminus \mathcal{D}}\|_F - \|\nabla \mathcal{L}(\boldsymbol{\Psi}^*)\|_{\mathcal{E}^c \setminus \mathcal{D}}) \cdot \|(\widehat{\boldsymbol{\Psi}} - \boldsymbol{\Psi}^*)_{\mathcal{E}^c \setminus \mathcal{D}}\|_F \\ \leq t(\|\nabla \mathcal{L}(\boldsymbol{\Psi}^*)\|_{\mathcal{E} \cup \mathcal{D}} + \|\boldsymbol{\lambda}_S\|_F) \cdot \|\widehat{\boldsymbol{\Psi}} - \boldsymbol{\Psi}^*\|_F. \end{aligned}$$

Further observing the facts that  $\|\boldsymbol{\lambda}_{\mathcal{E}^c \setminus \mathcal{D}}\|_F \geq \sqrt{|\mathcal{E}^c \setminus \mathcal{D}|} \|\boldsymbol{\lambda}_{\mathcal{E}^c \setminus \mathcal{D}}\|_{\min} \geq \sqrt{|\mathcal{E}^c \setminus \mathcal{D}|} \|\nabla \mathcal{L}(\boldsymbol{\Psi}^*)\|_{\max} \geq \|\nabla \mathcal{L}(\boldsymbol{\Psi}^*)\|_{\mathcal{E}^c \setminus \mathcal{D}}$  and  $t\|\widehat{\boldsymbol{\Psi}} - \boldsymbol{\Psi}^*\|_F = \|\widetilde{\boldsymbol{\Psi}} - \boldsymbol{\Psi}^*\|_F$ , dividing both sides by  $\|\widetilde{\boldsymbol{\Psi}} - \boldsymbol{\Psi}^*\|_F$ , we can simplify the above inequality to

$$(\|\boldsymbol{\Psi}^*\|_2 + r)^{-2} \|\widetilde{\boldsymbol{\Psi}} - \boldsymbol{\Psi}^*\|_F \leq \|\boldsymbol{\lambda}_S\|_F + \|\nabla \mathcal{L}(\boldsymbol{\Psi}^*)\|_{\mathcal{E} \cup \mathcal{D}} = \|\boldsymbol{\lambda}_S\|_F + \|\nabla \mathcal{L}(\boldsymbol{\Psi}^*)\|_{\mathcal{E}} \leq 2\lambda\sqrt{s},$$

where we use  $\|\nabla \mathcal{L}(\boldsymbol{\Psi}^*)\|_{\mathcal{E} \cup \mathcal{D}} = \|(\widehat{\mathbf{C}} - \mathbf{C}^*)_{\mathcal{E} \cup \mathcal{D}}\|_F = \|(\widehat{\mathbf{C}} - \mathbf{C}^*)_{\mathcal{E}}\|_F = \|\nabla \mathcal{L}(\boldsymbol{\Psi}^*)_{\mathcal{E}}\|_F$  in the equality, and the last inequality follows from the Cauchy-Schwarz inequality, the fact  $\|\boldsymbol{\lambda}\|_{\max} \leq \lambda$  and the assumption that  $\lambda \geq 2\|\nabla \mathcal{L}(\boldsymbol{\Psi}^*)\|_{\max}$ . Therefore, by the definition of  $r$ , we obtain  $\|\widetilde{\boldsymbol{\Psi}} - \boldsymbol{\Psi}^*\|_F \leq 2(\|\boldsymbol{\Psi}^*\|_2 + r)^2 \lambda\sqrt{s} \leq 8\|\boldsymbol{\Psi}^*\|_2^2 \lambda\sqrt{s} < r$ , which implies  $\widetilde{\boldsymbol{\Psi}} = \widehat{\boldsymbol{\Psi}}$  from the construction of  $\widetilde{\boldsymbol{\Psi}}$ . Thus  $\widehat{\boldsymbol{\Psi}}$  satisfies the desired  $\ell_2$  error bound.  $\square$

Recall the definition of  $\mathcal{E}_\ell$ ,  $1 \leq \ell \leq T$ . We can bound  $\|\widehat{\boldsymbol{\Psi}}^{(\ell)} - \boldsymbol{\Psi}^*\|_F$  in terms of  $\|\boldsymbol{\lambda}_S^{(\ell-1)}\|_F$ .

**Lemma A.5 (Sequential Bound).** Under the same assumptions and conditions in Lemma A.4, for  $\ell \geq 1$ ,  $\widehat{\boldsymbol{\Psi}}^{(\ell)}$  must satisfy

$$\|\widehat{\boldsymbol{\Psi}}^{(\ell)} - \boldsymbol{\Psi}^*\|_F \leq 4\|\boldsymbol{\Psi}^*\|_2^2 (\|\boldsymbol{\lambda}_S^{(\ell-1)}\|_F + \|\nabla \mathcal{L}(\boldsymbol{\Psi}^*)_{\mathcal{E}_\ell}\|_F).$$

*Proof of Lemma A.5.* Now if we assume that for all  $\ell \geq 1$ , we have the following

$$|\mathcal{E}_\ell| \leq 2s, \text{ where } \mathcal{E}_\ell \text{ is defined in (A.1), and} \quad (\text{A.7})$$

$$\|\boldsymbol{\lambda}_{\mathcal{E}_\ell^c \setminus \mathcal{D}}^{(\ell-1)}\|_{\min} \geq \lambda/2 \geq \|\nabla \mathcal{L}(\boldsymbol{\Psi}^*)\|_{\max}. \quad (\text{A.8})$$

Using the matrix Hölder inequality, we obtain

$$\|\boldsymbol{\lambda}_S^{(\ell-1)}\|_F \leq \sqrt{|\mathcal{S}|} \|\boldsymbol{\lambda}_S\|_{\max} \leq \lambda\sqrt{s} \text{ and } \|\nabla \mathcal{L}(\boldsymbol{\Psi}^*)_{\mathcal{E}_\ell}\|_F \leq \sqrt{|\mathcal{E}_\ell|} \|\nabla \mathcal{L}(\boldsymbol{\Psi}^*)_{\mathcal{E}_\ell}\|_{\max}.$$

Therefore, we have

$$\|\boldsymbol{\lambda}_S^{(\ell-1)}\|_F + \|\nabla \mathcal{L}(\boldsymbol{\Psi}^*)_{\mathcal{E}_\ell}\|_F \leq \lambda\sqrt{s} + \|\nabla \mathcal{L}(\boldsymbol{\Psi}^*)_{\mathcal{E}_\ell}\|_{\max} \sqrt{|\mathcal{E}_\ell|} \leq 2\lambda\sqrt{s}, \quad (\text{A.9})$$

where the second inequality is due to the assumption that  $\|\nabla \mathcal{L}(\boldsymbol{\Psi}^*)\|_{\max} \leq \lambda/2$ . The  $\ell_2$  error bound is given by Lemma A.4 by taking  $\boldsymbol{\lambda} = \boldsymbol{\lambda}^{(\ell-1)}$  and  $\mathcal{E} = \mathcal{E}_\ell$ , i.e.

$$\|\widehat{\boldsymbol{\Psi}}^{(\ell)} - \boldsymbol{\Psi}^*\|_F \leq 4\|\boldsymbol{\Psi}^*\|_2^2 \cdot (\|\boldsymbol{\lambda}_S^{(\ell-1)}\|_F + \|\nabla \mathcal{L}(\boldsymbol{\Psi}^*)_{\mathcal{E}_\ell}\|_F) \leq 8\|\boldsymbol{\Psi}^*\|_2^2 \cdot \lambda\sqrt{s}, \quad (\text{A.10})$$

where last inequality is due to (A.9). Therefore, we only need to prove that (A.7) and (A.8) hold by induction. For  $\ell = 1$ , we have  $\lambda \geq \lambda w(u)$  for any  $u$  and thus  $\mathcal{E}_1 = S$ , which implies that (A.7) and (A.8) hold for  $\ell = 1$ . Now assume that (A.7) and (A.8) hold at  $\ell - 1$  for some  $\ell \geq 2$ . Since  $(i, j) \in \mathcal{E}_\ell \setminus S$  implies that  $(i, j) \notin S$  and  $\lambda w(\widehat{\boldsymbol{\Psi}}_{ij}^{(\ell-1)}) = \lambda_j^{(\ell)} < \lambda w(u) = \lambda/2$ .

By assumption, and since  $w(x)$  is non-increasing, we must have  $|\widehat{\Psi}_{ij}^{(\ell-1)}| \geq u$ . Therefore by induction hypothesis, we obtain that

$$\sqrt{|\mathcal{E}_\ell \setminus S|} \leq \frac{\|\widehat{\Psi}_{\mathcal{E}_\ell \setminus S}^{(\ell-1)}\|_F}{u} \leq \frac{\|\widehat{\Psi}^{(\ell-1)} - \Psi^*\|_F}{u} \leq \frac{8\|\Psi^*\|_2^2 \lambda}{u} \cdot \sqrt{s} \leq \sqrt{s},$$

where the second last inequality follows from Lemma A.4, the fact that (A.7) and (A.8) hold at  $\ell - 1$ . This implies that  $|\mathcal{E}_\ell| \leq 2|S| = 2s$ . Now for such  $\mathcal{E}_\ell^c$ , we have  $\|\lambda_{\mathcal{E}_\ell^c}\|_{\min} \geq \lambda w(u) \geq \lambda/2 \geq \|\nabla \mathcal{L}(\Psi)\|_\infty$ , which completes the induction step.  $\square$

Our next lemma establishes the relationship between the adaptive regularization parameter  $\lambda$  and the estimator from the previous step.

**Lemma A.6.** Assume  $w(\cdot) \in \mathcal{T}$ . Let  $\lambda_{ij} = \lambda w(|\Theta_{ij}|)$  for some  $\Theta = (\Theta_{ij})$  and  $w(\Theta_S) = (w(\Theta_{ij}))_{(i,j) \in S}$ , then for the Frobenius norm  $\|\cdot\|_F$ , we have

$$\|\lambda_S\|_F \leq \lambda \|w(|\Theta_S^*| - u)\|_F + \lambda u^{-1} \|\Theta_S^* - \Theta_S\|_F.$$

*Proof of Lemma A.6.* By assumption, if  $|\Theta_{ij}^* - \Theta_{ij}| \geq u$ , then  $w(|\Theta_{ij}|) \leq 1 \leq u^{-1}|\Theta_{ij} - \Theta_{ij}^*|$ ; otherwise,  $w(|\Theta_{ij}|) \leq w(|\Theta_{ij}^*| - u)$ . Therefore, the following inequality always hold:

$$w(|\Theta_{ij}|) \leq w(|\Theta_{ij}^*| - u) + u^{-1}|\Theta_{ij}^* - \Theta_{ij}|.$$

Then by applying the  $\|\cdot\|_*$ -norm triangle inequality, we obtain that

$$\|\lambda_S\|_F \leq \lambda \|w(|\Theta_S^*| - u)\|_F + \lambda u^{-1} \|\Theta_S^* - \Theta_S\|_F.$$

$\square$

Our last technical result concerns a contraction property, namely, how the sequential approach improves the rate of convergence adaptively.

**Proposition A.7 (Contraction Property).** Assume that assumptions 3.1, 3.2 and 3.3 hold. Assume that  $\lambda \geq 2\|\nabla \mathcal{L}(\Psi^*)\|_{\max}$  and  $8\|\Psi^*\|_2^2 \lambda \sqrt{s} < 1$ . Then  $\widehat{\Psi}^{(\ell)}$  satisfies the following contraction property

$$\|\widehat{\Psi}^{(\ell)} - \Psi^*\|_F \leq 4\|\Psi^*\|_2^2 \|\nabla \mathcal{L}(\Psi^*)_S\|_F + \frac{1}{2} \|\widehat{\Psi}^{(\ell-1)} - \Psi^*\|_F.$$

*Proof of Proposition A.7.* Under the conditions of the theorem, the proof of Lemma A.5 yields that

$$|\mathcal{E}_\ell| \leq 2s, \text{ where } \mathcal{E}_\ell \text{ is defined in (A.1), and } \|\lambda_{\mathcal{E}_\ell^c \setminus D}^{(\ell-1)}\|_{\min} \geq \|\nabla \mathcal{L}(\Psi^*)\|_{\max}.$$

Thus, applying Lemma A.5 with  $\widehat{\Psi} = \widehat{\Psi}^{(\ell)}$ ,  $\lambda = \lambda^{(\ell-1)}$  and  $\mathcal{E} = \mathcal{E}_\ell$ , we obtain

$$\|\widehat{\Psi}^{(\ell)} - \Psi^*\|_F \leq 4\|\Psi^*\|_2^2 \cdot (\|\lambda_S^{(\ell-1)}\|_F + \|\nabla \mathcal{L}(\Psi^*)_{\mathcal{E}_\ell}\|_F). \quad (\text{A.11})$$

On the other side, by Lemma A.6, we can bound  $\|\lambda_S^{(\ell-1)}\|_F$  in terms of  $\|\widehat{\Psi}^{(\ell-1)} - \Psi^*\|_F$ :

$$\|\lambda_S^{(\ell-1)}\|_F \leq \lambda \|w(|\Psi_S^*| - u)\|_F + \lambda u^{-1} \|\widehat{\Psi}^{(\ell-1)} - \Psi^*\|_F. \quad (\text{A.12})$$

Plugging the bound (A.12) into (A.11) yields that

$$\begin{aligned} \|\widehat{\Psi}^{(\ell)} - \Psi^*\|_F &\leq 4\|\Psi^*\|_2^2 \left( \underbrace{\|\nabla \mathcal{L}(\Psi^*)_{\mathcal{E}_\ell}\|_F}_{\text{I}} + \lambda \|w(|\Psi_S^*| - u)\|_F \right) \\ &\quad + 4\|\Psi^*\|_2^2 \lambda u^{-1} \|\widehat{\Psi}^{(\ell-1)} - \Psi^*\|_F. \end{aligned} \quad (\text{A.13})$$

In the next, we bound term I. Separating the support of  $(\nabla\mathcal{L}(\Psi^*))_{\mathcal{E}_\ell}$  to  $S$  and  $\mathcal{E}_\ell \setminus S$  and then using triangle inequality, we obtain

$$\text{I} = \|\nabla\mathcal{L}(\Psi^*)_{\mathcal{E}_\ell}\|_{\text{F}} \leq \|\nabla\mathcal{L}(\Psi^*)_S\|_{\text{F}} + \|\nabla\mathcal{L}(\Psi^*)_{\mathcal{E}_\ell \setminus S}\|_{\text{F}}. \quad (\text{A.14})$$

Moreover, we have the following facts. First, we have  $\|\nabla\mathcal{L}(\Psi^*)_{\mathcal{E}_\ell \setminus S}\|_2 \leq \sqrt{|\mathcal{E}_\ell \setminus S|} \|\nabla\mathcal{L}(\Psi^*)\|_{\max}$  by the Hölder inequality. From the assumption, we know  $\|\nabla\mathcal{L}(\Psi^*)\|_{\max} \leq \lambda/2$ . Plugging these bounds into (A.14) results that  $\|\nabla\mathcal{L}(\Psi^*)_{\mathcal{E}_\ell}\|_{\text{F}} \leq \|\nabla\mathcal{L}(\Psi^*)_S\|_{\text{F}} + \lambda\sqrt{|\mathcal{E}_\ell \setminus S|}$ . Now, by following a similar argument in Lemma A.5, we can bound  $\sqrt{|\mathcal{E}_\ell \setminus S|}$  by  $\|\widehat{\Psi}_{\mathcal{E}_\ell \setminus S}^{(\ell-1)}\|_{\text{F}}/u \leq \|\widehat{\Psi}^{(\ell-1)} - \Psi^*\|_{\text{F}}/u$ . Therefore, term I can be bounded by  $\|\nabla\mathcal{L}(\Psi^*)_S\|_{\text{F}} + \lambda u^{-1} \|\widehat{\Psi}^{(\ell-1)} - \Psi^*\|_{\text{F}}$ . Plugging the upper bound for I into (A.13), we obtain

$$\begin{aligned} \|\widehat{\Psi}^{(\ell)} - \Psi^*\|_{\text{F}} &\leq 4\|\Psi^*\|_2^2 \left( \|\nabla\mathcal{L}(\Psi^*)_S\|_2 + \lambda \text{w}(|\Psi_S^*| - u) \right) \\ &\quad + (4\|\Psi^*\|_2^2 + 1)\lambda u^{-1} \|\widehat{\Psi}^{(\ell-1)} - \Psi^*\|_{\text{F}}. \end{aligned}$$

Now observing that  $\|\Psi_S^*\|_{\min} \geq u + \alpha\lambda \asymp \lambda$ , thus  $\text{w}(|\Psi_S^*| - u) \leq \text{w}(\alpha\lambda \cdot \mathbf{1}_S) = \mathbf{0}_S$ , where  $\mathbf{1}_S$  is a matrix with each entry equals to 1 and  $\mathbf{0}_S$  is defined similarly. Further notice that  $(4\|\Psi^*\|_2^2 + 1)\lambda u^{-1} \leq 1/2$ , we complete the proof.  $\square$

## B. Improved Convergence Rate

We develop an improved spectral norm convergence rate in this section. We collect the proof for Theorem 3.8 first and then give technical lemmas that are needed for the proof.

### B.1. Proof of Theorem 3.8

*Proof of Theorem 3.8.* Let us define  $S^{(\ell)} = \{(i, j) : |\Psi_{ij}^{(\ell)} - \Psi_{ij}^*| \geq u\}$ , where  $u$  is introduced in (A.1). Let  $S^{(0)} = \{(i, j) : |\Psi_{ij}^*| \geq u\} = S$ . Then Lemma B.5 implies

$$\|\lambda_{\mathcal{E}_\ell}^{(\ell-1)}\|_{\text{F}} \leq \lambda \|\text{w}(|\Psi_S^*| - u)\|_{\text{F}} + \lambda \sqrt{|S^{(\ell-1)} \cap S|} + \lambda \sqrt{|\mathcal{E}_\ell/S|}$$

For any  $(i, j) \in \mathcal{E}_\ell/S$ , we must have  $|\widehat{\Psi}_{ij}^{(\ell)}| = |\widehat{\Psi}_{ij} - \Psi_{ij}^*| > u$  and thus  $(i, j) \in S^{(\ell-1)}/S$ . Therefore, applying Lemma B.5 and using the fact that  $\|\Psi_S^*\|_{\max} \geq u + \alpha\lambda$ , we obtain

$$\|\widehat{\Psi}^{(\ell)} - \widehat{\Psi}^\circ\|_{\text{F}} \leq 32\|\Psi^*\|_2^2 \lambda \left\{ \sqrt{|S^{(\ell-1)} \cap S|} + \sqrt{|S^{(\ell-1)}/S|} \right\} \leq 32\sqrt{2}\|\Psi^*\|_2^2 \lambda \sqrt{|S^{(\ell-1)}|}.$$

On the other side,  $(i, j) \in S^{(\ell)}$  implies that

$$|\widehat{\Psi}_{ij}^{(\ell)} - \widehat{\Psi}_{ij}^\circ| \geq |\widehat{\Psi}_{ij}^{(\ell)} - \Psi_{ij}^*| - |\widehat{\Psi}_{ij}^\circ - \Psi_{ij}^*| \geq u - 2\kappa_2\lambda \geq 64\|\Psi^*\|_2^2 \lambda,$$

Exploiting the above fact, we can bound  $\sqrt{|S^{(\ell)}|}$  in terms of  $\|\widehat{\Psi}^{(\ell)} - \widehat{\Psi}^\circ\|_{\text{F}}$ :

$$\sqrt{|S^{(\ell)}|} \leq \frac{\|\widehat{\Psi}^{(\ell)} - \widehat{\Psi}^\circ\|_{\text{F}}}{64\|\Psi^*\|_2^2 \lambda} \leq \sqrt{|S^{(\ell-1)}|/2}.$$

By induction on  $\ell$ , we obtain

$$\sqrt{|S^{(\ell)}|} \leq \left(\frac{1}{2}\right)^{\ell/2} \sqrt{|S^{(0)}|} = \left(\frac{1}{2}\right)^{\ell/2} \sqrt{s}.$$

Since  $\ell > \log s / \log 2$ , we must have that the right hand side of the above inequality is smaller than 1, which implies that

$$S^{(\ell)} = \emptyset \text{ and } \widehat{\Psi}^{(\ell)} = \widehat{\Psi}^\circ.$$

Therefore, the estimator enjoys the strong oracle property. Using Lemma B.4 obtains us that

$$\|\widehat{\Psi}^{(\ell)} - \Psi^*\|_2 \leq \|\widehat{\Psi}^\circ - \Psi^*\|_2 \lesssim \|\mathbf{M}^*\|_2 \|(\widehat{\mathbf{C}} - \mathbf{C}^*)_S\|_{\max}.$$

Applying Lemma D.6 finishes the proof of theorem.  $\square$

## B.2. Technical Lemmas

We start with the definitions of some constants. For notational simplicity, let  $\kappa_1 = \|\Sigma^*\|_\infty$  and  $\mathcal{D} = \{(i, i) : 1 \leq i \leq d\}$ . Define the oracle estimator as

$$\widehat{\Psi}^\circ = \underset{\text{supp}(\Psi)=S, \Psi \in \mathcal{S}_+^d}{\text{argmin}} \left\{ \langle \Psi, \widehat{\mathbf{C}} \rangle - \log \det(\Psi) \right\}.$$

Recall that  $s_{\max} = \max_j \sum_i 1(\Theta_{ij}^*)$  is the maximum degree.

**Lemma B.1.** Suppose that the weight function satisfies that  $w(u) \geq 1/2$  for  $u$  defined in (A.1). Assume that  $2\lambda s_{\max} \leq \kappa_1^{-2} \|\Psi^*\|_2$ ,  $8\|\Psi^*\|_2^2 \lambda \sqrt{s} < 1$ . If  $\lambda \geq 2\|\nabla \mathcal{L}(\widehat{\Psi}^\circ)\|_{\max}$ , we must have

$$|\mathcal{E}_\ell| \leq 2s \quad \text{and} \quad \|\widehat{\Psi}^{(\ell)} - \widehat{\Psi}^\circ\|_F \leq 32\|\Psi^*\|_2^2 \|\lambda_{\mathcal{E}_\ell}^{(\ell-1)}\|_F.$$

*Proof of Lemma B.1.* If we assume that for all  $\ell \geq 1$ , we have the following

$$|\mathcal{E}_\ell| \leq 2s, \quad \text{where } \mathcal{E}_\ell \text{ is defined in (A.1), and} \quad (\text{B.1})$$

$$\|\lambda_{\mathcal{E}_\ell}^{(\ell-1)}\|_{\min} \geq \|\nabla \mathcal{L}(\widehat{\Psi}^\circ)\|_{\max}. \quad (\text{B.2})$$

Using lemma B.4, we obtain that  $\|\widehat{\Psi}^\circ\|_2 \leq \|\Psi^*\|_2 + \|\widehat{\Psi}^\circ - \Psi^*\|_\infty \leq \|\Psi^*\|_2 + 2\kappa_2 \lambda s_{\max}$ . Therefore, the assumption of the lemma implies  $4\|\widehat{\Psi}^\circ\|_2 \lambda \sqrt{s} < 1$ . Replacing  $S$  by  $\mathcal{E}_\ell$  in Lemma B.3 and using Hölder inequality, we have

$$\|\widehat{\Psi}^{(\ell)} - \widehat{\Psi}^\circ\|_F \leq 4\|\widehat{\Psi}^\circ\|_2^2 \|\lambda_{\mathcal{E}_\ell}^{(\ell-1)}\|_F \leq 16\|\Psi^*\|_2^2 \|\lambda_{\mathcal{E}_\ell}^{(\ell-1)}\|_F \leq 32\|\Psi^*\|_2^2 \lambda \sqrt{s}, \quad (\text{B.3})$$

For  $\ell = 1$ , we have  $\lambda \geq \lambda w(u)$  and thus  $\mathcal{E}_1 = S$ , which implies that (B.1) and (B.2) hold for  $\ell = 1$ . Now assume that (B.1) and (B.2) hold at  $\ell - 1$  for some  $\ell \geq 2$ . Since  $j \in \mathcal{E}_\ell \setminus S$  implies that  $j \notin S$  and  $\lambda w(\beta_j^{(\ell-1)}) = \lambda_j^{(\ell)} < \lambda w(u)$  by assumption, and since  $w(x)$  is decreasing, we must have  $|\beta_j^{(\ell-1)}| \geq u$ . Therefore by induction hypothesis, we obtain that

$$\sqrt{|\mathcal{E}_\ell \setminus S|} \leq \frac{\|\widehat{\Psi}_{\mathcal{E}_\ell \setminus S}^{(\ell-1)}\|_F}{u} \leq \frac{\|\widehat{\Psi}^{(\ell-1)} - \widehat{\Psi}^\circ\|_F}{u} \leq \frac{32\|\Psi^*\|_2^2 \lambda}{u} \sqrt{s} \leq \sqrt{s},$$

where the last inequality follows from the definition of  $u$  hold at  $\ell - 1$ . This inequality implies that  $|\mathcal{E}_\ell| \leq 2|S| = 2s$ . Now for such  $\mathcal{E}_\ell^c$ , we have

$$\|\lambda_{\mathcal{E}_\ell^c}\|_{\min} \geq \lambda w(u) \geq \lambda/2 \geq \|\nabla \mathcal{L}(\widehat{\Psi}^\circ)\|_{\max},$$

which completes the induction step. This completes the proof.  $\square$

With some abuse of notation, we let  $|\Psi_S^*| = (|\Psi_{ij}^*|)_{(i,j) \in S}$  and  $|\Psi_S^*| - u = (\Psi_{ij}^* - u)_{(i,j) \in S}$ . The following inequality bounds the regularization parameter  $\lambda_{\mathcal{E}} = \lambda w(|\Psi_{\mathcal{E}}^*|) = (\lambda w(\Psi_{ij}^*))_{(i,j) \in \mathcal{E}}$  in terms of functionals of  $\Psi^*$  and  $\Psi$ .

**Lemma B.2.** Let  $\lambda = \lambda w(|\Psi|)$ . For any set  $\mathcal{E} \supseteq S$ ,  $\lambda_{\mathcal{E}}$  must satisfy

$$\|\lambda_{\mathcal{E}}\|_F \leq \lambda \|w(|\Psi_S^*| - u)\|_F + \lambda \sqrt{|\mathcal{E}/S|} + \lambda |\{j \in S : |\Psi_{ij} - \Psi_{ij}^*| \geq u\}|^{1/2}$$

*Proof.* By triangle inequality, we have  $\|\lambda_{\mathcal{E}}\|_F \leq \|\lambda_S\|_F + \lambda \sqrt{|\mathcal{E}/S|}$ . We further bound  $\|\lambda_S\|_F$ . If  $|\Psi_{ij} - \Psi_{ij}^*| \geq u$ , then we have  $w(|\Psi_{ij}|) \leq 1 \leq I(|\Psi_{ij} - \Psi_{ij}^*| \geq u)$ , otherwise, since because  $w(\cdot)$  is non-increasing and thus  $|\Psi_{ij} - \Psi_{ij}^*| < u$  implies  $w(|\Psi_{ij}|) \leq w(|\Psi_{ij}^*| - u)$ . Therefore, using the Cauchy Schwartz inequality completes our proof.  $\square$

Define the following optimization problem

$$\widehat{\Psi} = \underset{\Psi \in \mathcal{S}_+^d}{\text{argmin}} \left\{ \langle \Psi, \widehat{\mathbf{C}} \rangle - \log \det(\Psi) + \|\lambda \odot \Psi\|_{1, \text{off}} \right\}. \quad (\text{B.4})$$



**Lemma B.3.** Let  $\|\lambda_{S^c/\mathcal{D}}\|_{\min} \geq \|\nabla\mathcal{L}(\widehat{\Psi}^\circ)\|_{\max}$  and  $4\|\widehat{\Psi}^\circ\|_2\lambda\sqrt{s} < 1$ . Then  $\widehat{\Psi}$  must satisfy

$$\|\widehat{\Psi} - \widehat{\Psi}^\circ\|_F \leq 4\|\widehat{\Psi}^\circ\|_2^2\|\lambda_S\|_F.$$

*Proof.* We construct an intermediate solution  $\widetilde{\Theta} = \Theta^* + t(\widehat{\Theta} - \Theta^*)$ , where  $t$  is chosen such that  $\|(\widetilde{\Theta} - \Theta^*)\|_F = r$ , if  $\|(\widehat{\Theta} - \Theta^*)\|_F > r$ ;  $t = 1$  otherwise. Here  $r$  satisfies  $4\|\widehat{\Psi}^\circ\|_2^2\lambda\sqrt{s} < r \leq \|\widehat{\Psi}^\circ\|_2$ . Lemma A.3 implies that

$$(\|\widehat{\Psi}^\circ\|_2 + r)^{-2}\|\widetilde{\Psi} - \widehat{\Psi}^\circ\|_F \leq \langle \nabla\mathcal{L}(\widetilde{\Psi}) - \nabla\mathcal{L}(\widehat{\Psi}^\circ), \widetilde{\Psi} - \widehat{\Psi}^\circ \rangle \equiv D_{\mathcal{L}}^s(\widetilde{\Psi}, \widehat{\Psi}^\circ). \quad (\text{B.5})$$

Then, we use Lemma E.2 to upper bound the right hand side of the above inequality

$$D_{\mathcal{L}}^s(\widetilde{\Psi}, \widehat{\Psi}^\circ) \leq tD_{\mathcal{L}}^s(\widehat{\Psi}, \widehat{\Psi}^\circ) = t\langle \nabla\mathcal{L}(\widehat{\Psi}) - \nabla\mathcal{L}(\widehat{\Psi}^\circ), \widehat{\Psi} - \widehat{\Psi}^\circ \rangle.$$

Plugging the above inequality into (B.5), we obtain

$$(\|\widehat{\Psi}^\circ\|_2 + r)^{-2}\|\widetilde{\Psi} - \widehat{\Psi}^\circ\|_F^2 \leq \langle \nabla\mathcal{L}(\widehat{\Psi}) - \nabla\mathcal{L}(\widehat{\Psi}^\circ), \widetilde{\Psi} - \widehat{\Psi}^\circ \rangle. \quad (\text{B.6})$$

We further control the right hand side of the above inequality by exploiting the first order optimality condition, which is  $\nabla\mathcal{L}(\widehat{\Psi}) + \lambda \odot \widehat{\Gamma} = \mathbf{0}$  and  $\nabla\mathcal{L}(\widehat{\Psi}^\circ)_{S \cup \mathcal{D}} = \mathbf{0}$ . Therefore, adding and subtracting term  $\lambda \odot \widehat{\Gamma}$  to the right hand side of (B.6) and using the optimality condition obtains us that

$$(\|\widehat{\Psi}^\circ\|_2 + r)^{-2}\|\widetilde{\Psi} - \widehat{\Psi}^\circ\|_F^2 + \underbrace{\langle \lambda \odot \widehat{\Gamma}, \widetilde{\Psi} - \widehat{\Psi}^\circ \rangle}_I + \underbrace{\langle \nabla\mathcal{L}(\widehat{\Psi}^\circ), \widetilde{\Psi} - \widehat{\Psi}^\circ \rangle}_{II} \leq 0. \quad (\text{B.7})$$

Therefore, to bound  $\|\widetilde{\Psi} - \widehat{\Psi}^\circ\|_F^2$ , it suffices to bound I and II separately. For term I, by decomposing the support to  $S$  and  $S^c/\mathcal{D}$ , then using matrix Hölder inequality, we have

$$I \geq -\|\lambda_S\|_F \|(\widetilde{\Psi} - \widehat{\Psi}^\circ)_S\|_F + \|\lambda_{S^c/\mathcal{D}}\|_{\min} \|\text{vec}(\widetilde{\Psi} - \widehat{\Psi}^\circ)_{S^c/\mathcal{D}}\|_1.$$

Again, by using the optimality condition, we has

$$II = \langle \nabla\mathcal{L}(\widehat{\Psi}^\circ)_{S^c/\mathcal{D}}, (\widetilde{\Psi} - \widehat{\Psi}^\circ)_{S^c/\mathcal{D}} \rangle \geq -\|\nabla\mathcal{L}(\widehat{\Psi}^\circ)_{S^c/\mathcal{D}}\|_{\max} \|\text{vec}(\widetilde{\Psi} - \widehat{\Psi}^\circ)_{S^c/\mathcal{D}}\|_1.$$

By plugging the upper bound for I and II back into (B.7), we have

$$\begin{aligned} & (\|\widehat{\Psi}^\circ\|_2 + r)^{-2}\|\widetilde{\Psi} - \widehat{\Psi}^\circ\|_F^2 + (\|\lambda_{S^c/\mathcal{D}}\|_{\min} - \|\nabla\mathcal{L}(\widehat{\Psi}^\circ)_{S^c/\mathcal{D}}\|_{\max}) \|\text{vec}(\widetilde{\Psi} - \widehat{\Psi}^\circ)\|_1 \\ & \leq \|\lambda_S\|_F \|(\widetilde{\Psi} - \widehat{\Psi}^\circ)_S\|_F. \end{aligned}$$

By assumption, we know that  $\|\lambda\|_{\min} \geq \|\nabla\mathcal{L}(\widehat{\Psi}^\circ)\|_{\max}$ , which implies that the second term in the right hand side of the above inequality is positive. Thus, we have  $(\|\widehat{\Psi}^\circ\|_2 + r)^{-2}\|\widetilde{\Psi} - \widehat{\Psi}^\circ\|_F \leq \|\lambda_S\|_F$ . Now since  $4\|\widehat{\Psi}^\circ\|_2^2\lambda\sqrt{s} < r \leq \|\widehat{\Psi}^\circ\|_2$ , we obtain that  $\|\widetilde{\Psi} - \widehat{\Psi}^\circ\|_F \leq 4\|\widehat{\Psi}^\circ\|_2^2\|\lambda_S\|_F \leq 4\|\widehat{\Psi}^\circ\|_2^2\lambda\sqrt{s} < r$ . By the construction of  $\widetilde{\Psi}$ , we must have  $t = 1$ , and thus  $\widetilde{\Psi} = \widehat{\Psi}$ .  $\square$

Recall that  $\mathbf{M}^*$  is the sparsity pattern matrix corresponding to  $\Psi^*$ .

**Lemma B.4.** If  $4\kappa_1^4 c_n + 1 < \sqrt{1 + 4\kappa_1/s_{\max}}$  and  $\|(\widehat{\mathbf{C}} - \mathbf{C}^*)_S\|_{\max} \leq c_n/2$  for a sequence  $c_n$ , then we have

$$\|\widehat{\Psi}^\circ - \Psi^*\|_{\max} \leq \kappa_1^2 c_n \text{ and } \|\widehat{\Psi}^\circ - \Psi^*\|_2 \leq \kappa_1^2 c_n \|\mathbf{M}^*\|_2.$$

*Proof of Lemma B.4.* Let  $\Delta = \widehat{\Psi}^\circ - \Psi^*$ . It suffices to show that  $\|\Delta\|_{\max} \leq r$ , where  $r = \kappa_1^2 c_n$ . To show this, we construct an intermediate estimator,  $\widetilde{\Psi} = \Psi^* + t(\widehat{\Psi}^\circ - \Psi^*)$ . We choose  $t$  such that  $\|\widetilde{\Psi} - \Psi^*\|_{\max} = r$ , if  $\|\Delta\|_{\max} > r$ , and  $\widetilde{\Psi} = \widehat{\Psi}$ , otherwise. For a matrix  $\mathbf{A}$ , let  $\mathbf{A}_S$  be a matrix agreeing with  $\mathbf{A}$  on  $S$  and having 0 elsewhere. Using the two term Taylor expansion, we know that there exists a  $\gamma \in [0, 1]$  such that  $\widetilde{\Psi}^* = \Psi^* + \gamma(\widetilde{\Psi} - \Psi^*)$ ,

$$\text{vec}\{\nabla\mathcal{L}(\widetilde{\Psi})\} = \text{vec}\{\nabla\mathcal{L}(\Psi^*)\} + \nabla^2\mathcal{L}(\widetilde{\Psi}^*)\text{vec}(\widetilde{\Psi} - \Psi^*),$$

which implies that

$$\text{vec}\left\{\mathbf{C}_{\mathcal{E}}^* - (\tilde{\Psi}_{\mathcal{E}})^{-1}\right\} - \left(\tilde{\Psi}_{\mathcal{E}}^* \otimes \tilde{\Psi}_{\mathcal{E}}^*\right)^{-1} \text{vec}\left(\tilde{\Psi}_{\mathcal{E}} - \Psi_{\mathcal{E}}^*\right) = \mathbf{0}, \quad (\text{B.8})$$

where  $\mathcal{E} = S \cup \mathcal{D}$ . Let  $\tilde{\Delta} = \tilde{\Psi}_{\mathcal{E}} - \Psi_{\mathcal{E}}^* = t\Delta$ . Define  $f(\text{vec}(\tilde{\Delta}))$  to be

$$\left\| \text{vec}\left\{\mathbf{C}_{\mathcal{E}}^* - (\Psi_{\mathcal{E}}^* + \tilde{\Delta})_{\mathcal{E}}^{-1}\right\} - \Gamma_{\mathcal{E}\mathcal{E}}^* \text{vec}(\tilde{\Delta}_{\mathcal{E}}) \right\|_{\infty},$$

in which  $\Gamma_{\mathcal{E}\mathcal{E}}^* = (\Psi_{\mathcal{E}}^* \otimes \Psi_{\mathcal{E}}^*)^{-1}$ . By the matrix expansion formula that  $(\mathbf{A} + \Delta)^{-1} - \mathbf{A}^{-1} = \sum_{m=1}^{\infty} (-\mathbf{A}^{-1}\Delta)^m \mathbf{A}^{-1}$ ,  $f\{\text{vec}(\tilde{\Delta})\}$  reduces to

$$\left\| \text{vec}\left[\left\{\sum_{m=2}^{\infty} (-\Sigma^* \tilde{\Delta})^m \Sigma^*\right\}_{\mathcal{E}}\right] \right\|_{\infty}.$$

Using triangle inequality, we then obtain that

$$f\{\text{vec}(\tilde{\Delta})\} \leq \max_{(j,k) \in \mathcal{E}} \sum_{m=2}^{\infty} \left| \mathbf{e}_j^T (\Sigma^* \tilde{\Delta})^m \Sigma^* \mathbf{e}_k \right|.$$

Further applying Hölder inequality to each single term in the right hand side of the above displayed inequality, we have

$$\left| \mathbf{e}_j^T (\Sigma^* \tilde{\Delta})^m \Sigma^* \mathbf{e}_k \right| \leq \|\Sigma^*\|_{\infty}^{m+1} \|\tilde{\Delta}\|_{\infty}^{m-1} \|\tilde{\Delta}\|_{\max} \leq s_{\max}^{m-1} \|\Sigma^*\|_{\infty}^{m+1} \|\tilde{\Delta}\|_{\max}^m,$$

where we use the fact  $\|\Delta\|_{\infty} \leq s_{\max} \|\Delta\|_{\max}$ . Therefore, we obtain

$$f\{\text{vec}(\tilde{\Delta})\} \leq \sum_{m=2}^{\infty} s_{\max}^{m-1} \|\Sigma^*\|_{\infty}^{m+1} \|\tilde{\Delta}\|_{\max}^m = \frac{\kappa_1^3 s_{\max} \|\tilde{\Delta}\|_{\max}^2}{1 - \kappa_1 s_{\max} \|\tilde{\Delta}\|_{\max}},$$

which, by triangle inequality, implies that

$$\|\tilde{\Delta}\|_{\max} \leq \|\Gamma_{\mathcal{E}\mathcal{E}}^*\|_{\infty} \left( \left\| \text{vec}\left\{\mathbf{C}_{\mathcal{E}}^* - (\Psi_{\mathcal{E}}^* + \tilde{\Delta})_{\mathcal{E}}^{-1}\right\} \right\|_{\infty} + \frac{\kappa_1^3 s_{\max} \|\tilde{\Delta}\|_{\max}^2}{1 - \kappa_1 s_{\max} \|\tilde{\Delta}\|_{\max}} \right).$$

Utilizing the KKT condition  $\hat{\mathbf{C}}_{\mathcal{E}} = \hat{\Psi}_{\mathcal{E}}^{\circ}$ , the fact  $\|\hat{\mathbf{C}} - \mathbf{C}^*\|_{\max} \leq c_n/2$  and  $4\kappa_1^4 c_n < -1 + \sqrt{1 + \kappa_1/s_{\max}}$ , we obtain

$$\|\tilde{\Delta}\|_{\max} \leq \kappa_1^2 c_n \left( \frac{1}{2} + \frac{\kappa_1^3 s_{\max} r^2}{1 - \kappa_1 s_{\max} r} \right) < \kappa_1^2 c_n \equiv r,$$

which is a contradiction. Thus,  $\tilde{\Delta} = \Delta$  and  $\hat{\Psi}^{\circ}$  satisfies the desired maximum norm bound. For the spectral norm bound, we utilize Lemma E.6 and obtain that

$$\|\hat{\Psi}^{\circ} - \Psi^*\|_2 \leq \|\mathbf{M}^*\|_2 \|\hat{\Psi}^{\circ} - \Psi^*\|_{\max} \leq \kappa_1^2 c_n \|\mathbf{M}^*\|_2.$$

The proof is finished.  $\square$

## C. Semiparametric Graphical Model

*Proof of Theorem 4.3.* We need the follows lemma, which are taken from (Liu et al., 2012). It provides a nonasymptotic probability bound for estimating  $\Sigma^{\text{npn}}$  using  $\hat{S}^{\tau}$ .

**Lemma C.1.** Let  $C$  be a constant. For any  $n \gtrsim \log d$ , with probability at least  $1 - 8/d$ , we have

$$\sup_{jk} |\hat{S}_{jk}^{\tau} - \Sigma_{jk}^{\text{npn}}| \leq C \sqrt{\frac{\log d}{n}}.$$

The rest of the proof is adapted from that of Theorem 4.3 and thus is omitted.  $\square$

## D. Concentration Inequality

In this section, we establish the concentration inequalities which are the key technical tools to the large probability bounds in Section 3.

**Lemma D.1** (Sub-Gaussian Tail Bound). Let  $\mathbf{X} = (X_1, X_2, \dots, X_d)^\top$  be a zero-mean random vector with covariance  $\Sigma^*$  such that each  $X_i/\sigma_{ii}^*$  is sub-Gaussian with variance proxy 1. Then there exists constants  $c_1$  and  $t_0$  such that for all  $t$  with  $0 \leq t \leq t_0$  the associated sample covariance  $\widehat{\Sigma}$  satisfies the following tail probability bound

$$\mathbb{P}(|\widehat{\sigma}_{ij} - \sigma_{ij}^*| \geq t) \leq 8 \exp\{-c_1 n t^2\}.$$

*Proof of Lemma D.1.* By the definition of the sample covariance matrix, we have  $\widehat{\sigma}_{ij} = n^{-1} \sum_{k=1}^n (X_i^{(k)} - \bar{X}_i)(X_j^{(k)} - \bar{X}_j) = n^{-1} \sum_{k=1}^n X_i^{(k)} X_j^{(k)} - \bar{X}_i \bar{X}_j$ . Therefore we can decompose  $\widehat{\sigma}_{ij} - \sigma_{ij}^*$  as  $n^{-1} \sum_{k=1}^n X_i^{(k)} X_j^{(k)} - \sigma_{ij}^* - \bar{X}_i \bar{X}_j$ . By applying the union sum bound, we obtain that

$$\mathbb{P}\left(|\widehat{\sigma}_{ij} - \sigma_{ij}^*| \geq t\right) \leq \underbrace{\mathbb{P}\left(\left|\frac{1}{n} \sum_{k=1}^n X_i^{(k)} X_j^{(k)} - \sigma_{ij}^*\right| \geq \frac{t}{2}\right)}_{\text{(R1)}} + \underbrace{\mathbb{P}\left(|\bar{X}_i \bar{X}_j| \geq \frac{t}{2}\right)}_{\text{(R2)}}$$

In the sequel, we bound (R1) and (R2) separately. For term (R1), following the argument of Lemma A.3 in (Bickel and Levina, 2008), there exists constant  $c'_1$  and  $t'_0$  not depending  $n, d$  such that

$$\text{(R1)} = \mathbb{P}\left(\left|\frac{1}{n} \sum_{k=1}^n X_i^{(k)} X_j^{(k)} - \sigma_{ij}^*\right| \geq \frac{t}{2}\right) \leq 4 \exp\left\{-c'_1 n t^2\right\}$$

for all  $t$  satisfying  $0 \leq t \leq t_0$ . Next, we bound the term (R2). By the linear structure of sub-Gaussian random variables, we obtain that  $\sqrt{n}\bar{X}_i \sim \text{sub-Gaussian}(0, \sigma_{ii}^*)$  for all  $1 \leq i \leq d$ . Therefore, by applying Lemma E.1, we obtain that  $|\sqrt{n}\bar{X}_i \cdot \sqrt{n}\bar{X}_j|$  is a sub-exponential random variable with  $\psi_1$  norm bounded by  $2\|\sqrt{n}\bar{X}_i\|_{\psi_2}\|\sqrt{n}\bar{X}_j\|_{\psi_2}$ . We give explicit bounds for the  $\psi_2$ -norm of  $\sqrt{n}\bar{X}_i$  and  $\sqrt{n}\bar{X}_j$ . By the Chernoff bound, the tail probability of  $\sqrt{n}\bar{X}_i$  can be bounded in the following

$$\mathbb{P}\left(|\sqrt{n}\bar{X}_i| \geq t\right) \leq 2 \exp\left\{-\frac{t^2}{2\sigma_{ii}^*}\right\}.$$

For every non-negative random variable  $Z$ , integration by parts yields the identity  $\mathbb{E}Z = \int_0^\infty \mathbb{P}(Z \geq u) du$ . We apply this for  $Z = |\sqrt{n}\bar{X}_i|^p$  and obtain after change of variables  $u = t^p$  that

$$\begin{aligned} \mathbb{E}|\sqrt{n}\bar{X}_i|^p &= \int_0^\infty \mathbb{P}(|\sqrt{n}\bar{X}_i| \geq t) \cdot p t^{p-1} dt \leq \int_0^\infty 2p \cdot \exp\left\{-\frac{t^2}{2\sigma_{ii}^*}\right\} t^{p-1} dt \\ &= p(2\sigma_{ii}^*)^{p/2} \cdot \Gamma\left(\frac{p}{2}\right) \leq p(2\sigma_{ii}^*)^{p/2} \cdot \left(\frac{p}{2}\right)^{p/2}, \end{aligned}$$

which indicates that  $\|\sqrt{n}\bar{X}_i\|_{\psi_1} \leq \sqrt{2\sigma_{ii}^*}$ . The Gamma function is defined as  $\Gamma(t) = \int_0^\infty e^{-x} x^{t-1} dx$ . Similarly, we can bound  $\|\sqrt{n}\bar{X}_j\|_{\psi_2}$  by  $\sqrt{2\sigma_{jj}^*}$ . Therefore we obtain  $\|\sqrt{n}\bar{X}_i \cdot \sqrt{n}\bar{X}_j\|_{\psi_1} \leq 2\sqrt{\sigma_{ii}^* \sigma_{jj}^*} \leq 2\sigma_{\max}^2$ , where  $\sigma_{\max}^2 = \max\{\sigma_{11}^*, \dots, \sigma_{dd}^*\}$ . Define  $Z_{ij} = |\sqrt{n}\bar{X}_i \cdot \sqrt{n}\bar{X}_j|$ . Let  $\delta = (e-1)(2\sigma_{\max}^2 e^2)^{-1}$  and write the Taylor expansion series of the exponential function, we obtain

$$\mathbb{E} \exp\{\delta Z_{ij}\} = 1 + \sum_{k=1}^{\infty} \frac{\delta^k \mathbb{E}(Z_{ij}^k)}{k!} \leq 1 + \sum_{k=1}^{\infty} \frac{\delta^k (2\sigma_{\max}^2 k)^k}{k!} \leq 1 + \sum_{k=1}^{\infty} (2\sigma_{\max}^2 \delta \cdot e)^k \leq e,$$

where we use  $k! \geq (k/e)^k$  in the last second inequality. Exponenting and using the Markov inequality yields that

$$\mathbb{P}\left(Z_{ij} \geq t\right) = \mathbb{P}\left(\delta Z_{ij} \geq \delta t\right) = \mathbb{P}\left(e^{\delta Z_{ij}} \geq e^{\delta t}\right) \leq \frac{\mathbb{E} e^{\delta Z_{ij}}}{e^{\delta t}} \leq \exp\{1 - \delta t\},$$

for all  $t \geq 0$ . Using the above result, we can bound (R2) as

$$(R2) \leq \mathbb{P}\left(Z_{ij} \geq \frac{nt}{2}\right) \leq \exp\left\{1 - \frac{\delta nt}{2}\right\} \leq 4 \exp\left\{1 - \frac{\delta nt}{2}\right\}.$$

Combing the bounds for (R1) and (R2), taking  $c_1 = \min\{c'_1, \delta\}$  and  $t_0 = \min\{1, t'_0\}$  obtain us that

$$\mathbb{P}(|\hat{\sigma}_{ij} - \sigma_{ij}^*| \geq t) \leq 8 \exp\{-c_1 nt^2\} \forall t \leq t_0,$$

which completes the proof.  $\square$

We then develop a large deviation bound for marginal variances.

**Lemma D.2 (Large Deviation Bound for Marginal Variance).** Let  $\mathbf{X} = (X_1, X_2, \dots, X_d)^\top$  be a zero-mean random vector with covariance  $\Sigma^*$  such that each  $X_i/\sqrt{\Sigma_{ii}^*}$  is sub-Gaussian with variance proxy 1, and  $\{\mathbf{X}^{(k)}\}_{k=1}^n$  be  $n$  i.i.d. samples from  $\mathbf{X}$ . Let  $C(\varepsilon) = 2^{-1}(\varepsilon - \log(1 + \varepsilon)) > 0$ . Then, for any  $\varepsilon \geq 0$ , we must have

$$\mathbb{P}\left(|\hat{\Sigma}_{ii} - \Sigma_{ii}^*| > \varepsilon \cdot \Sigma_{ii}^*\right) \leq 2 \cdot \exp\{-n \cdot C(\varepsilon)\}.$$

*Proof.* We write  $Z_i^{(k)} = (\Sigma_{ii}^*)^{-1/2} X_i^{(k)}$  and  $\tilde{\Sigma}_{ii} = n^{-1} \sum_{k=1}^n Z_i^{(k)} \cdot Z_i^{(k)}$ , for  $1 \leq i \leq d$ . Let  $\varsigma_i^{(k)} = Z_i^{(k)} \cdot Z_i^{(k)} \sim \chi_1^2$ , for  $1 \leq k \leq n$ . Therefore, the moment-generating function of  $\varsigma_i^{(k)}$  is  $M_{\varsigma_i^{(k)}}(t) = (1 - 2t)^{-1/2}$ , for  $t \in (-\infty, 1/2)$ . Next, we control the tail probability of  $\tilde{\Sigma}_{ii} > 1 + \varepsilon$  and  $\tilde{\Sigma}_{ii} < 1 - \varepsilon$ , respectively. For the tail probability of  $\tilde{\Sigma}_{ii} > 1 + \varepsilon$ , by applying Lemma E.8, we obtain

$$\mathbb{P}\left(\frac{\varsigma_i^{(1)} + \dots + \varsigma_i^{(n)}}{n} > 1 + \varepsilon\right) \leq \exp\{-n \cdot A(\varepsilon)\},$$

where  $A(\varepsilon) = \sup_t \{(1 + \varepsilon)t + 2^{-1} \log(1 - 2t)\} = 2^{-1}(\varepsilon - \log(1 + \varepsilon))$ . Similarly, for any  $\varepsilon > 0$ , we obtain the tail probability of  $\tilde{\Sigma}_{ii} < 1 - \varepsilon$  as

$$\mathbb{P}\left(\frac{\varsigma_i^{(1)} + \dots + \varsigma_i^{(n)}}{n} < 1 - \varepsilon\right) \leq \exp\{-n \cdot B(\varepsilon)\},$$

where  $B(\varepsilon) = \sup_t \{(1 - \varepsilon)t + 2^{-1} \log(1 - 2t)\}$ . After some algebra, we obtain  $B(\varepsilon) = -2^{-1}(\varepsilon + \log(1 - \varepsilon))$ , if  $\varepsilon < 1$ ;  $B(\varepsilon) = +\infty$ , otherwise. Let  $C(\varepsilon) = \min\{A(\varepsilon), B(\varepsilon)\} = 2^{-1}(\varepsilon - \log(1 + \varepsilon))$ . Therefore, combing the above two inequalities by union bound, we obtain  $\mathbb{P}\left(|n^{-1}(\varsigma_i^{(1)} + \dots + \varsigma_i^{(n)}) - 1| > \varepsilon\right) \leq 2 \cdot \exp\{-n \cdot C(\varepsilon)\}$ . Note that we have  $\hat{\Sigma}_{ii} = (\Sigma_{ii}^*)^{-1} \cdot \tilde{\Sigma}_{ii} = n^{-1}(\varsigma_i^{(1)} + \dots + \varsigma_i^{(n)})$ . Thus, we obtain

$$\mathbb{P}\left(|\hat{\Sigma}_{ii} - \Sigma_{ii}^*| > \varepsilon \cdot \Sigma_{ii}^*\right) \leq 2 \cdot \exp\{-n \cdot C(\varepsilon)\}.$$

$\square$

Our next results characterizes a large deviation bound for sample correlation matrix.

**Lemma D.3 (Large Deviation Bound for Sample Correlation).** Let  $\mathbf{X} = (X_1, X_2, \dots, X_d)^\top$  be a zero-mean random vector with covariance matrix  $\Sigma^*$  such that each  $X_i/\sqrt{\Sigma_{ii}^*}$  is sub-Gaussian with variance proxy 1 and  $\{\mathbf{X}^{(k)}\}_{k=1}^n$  be  $n$  independent and identically distributed copies of  $\mathbf{X}$ . Let  $\hat{\Sigma} = 1/n \sum_{k=1}^n \mathbf{X}^{(k)} \mathbf{X}^{(k)\top}$  denote the sample covariance and  $\hat{\mathbf{C}} = \hat{\mathbf{W}}^{-1} \hat{\Sigma} \hat{\mathbf{W}}^{-1}$  denote the sample correlation matrix, where  $\hat{\mathbf{W}}^2$  is the diagonal matrix with diagonal elements of  $\hat{\Sigma}$ . Further let  $\hat{\rho}_{ij}$  and  $\rho_{ij}$  be the  $(i, j)$ th element of  $\hat{\mathbf{C}}$  and  $\mathbf{C}^*$  respectively. Define  $c_2 = \min\{4^{-1} c_1 \min(\Sigma_{ii}^*)^2, 1/6\}$ . Then, for  $0 \leq \varepsilon \leq \min\{1/2, t_0 \max_i \Sigma_{ii}^*\}$ , we have

$$\mathbb{P}\left(|\hat{\rho}_{ij} - \rho_{ij}| > \varepsilon\right) \leq 6 \exp\left\{-c_2 n \cdot \varepsilon^2\right\}, \text{ where } 1 \leq i \neq j \leq d.$$

*Proof of Lemma D.3.* We denote the sample correlation as  $\widehat{\rho}_{ij} = (\widehat{\Sigma}_{ii} \cdot \widehat{\Sigma}_{jj})^{-1/2} \widehat{\Sigma}_{ij}$ . To prove the tail probability bound. It suffices to prove the tail probability bound for  $\widehat{\rho}_{ij} - \rho_{ij} > \varepsilon$  and  $\widehat{\rho}_{ij} - \rho_{ij} < -\varepsilon$ , respectively. We start with the tail probability bound for  $\widehat{\rho}_{ij} - \rho_{ij} > \varepsilon$ . Let us assume that  $\rho_{ij} \geq 0$ . Using the basic probability argument, we have  $\mathbb{P}(A) = \mathbb{P}(A \cap B) + \mathbb{P}(A \cap B^c) \leq \mathbb{P}(A) + \mathbb{P}(B^c)$ . Thus, for any  $0 \leq t \leq 1$  we obtain

$$\begin{aligned} \mathbb{P}\left(\widehat{\rho}_{ij} - \rho_{ij} > \varepsilon\right) &= \mathbb{P}\left(\widehat{\Sigma}_{ij} - (\widehat{\Sigma}_{ii} \widehat{\Sigma}_{jj})^{-1/2} \cdot \rho_{ij} > (\widehat{\Sigma}_{ii} \widehat{\Sigma}_{jj})^{-1/2} \cdot \varepsilon\right) \\ &\leq \underbrace{\mathbb{P}\left(\widehat{\Sigma}_{ij} - (\Sigma_{ii}^* \Sigma_{jj}^*)^{-1/2} (1-t)^{-1} \cdot \rho_{ij} > (\Sigma_{ii}^* \Sigma_{jj}^*)^{-1/2} (1-t)^{-1} \cdot \varepsilon\right)}_{\text{(R1.1)}} \\ &\quad + \mathbb{P}\left(\widehat{\Sigma}_{ii} - \Sigma_{ii}^* > \Sigma_{ii}^* \cdot t\right) + \mathbb{P}\left(\widehat{\Sigma}_{jj} - \Sigma_{jj}^* > \Sigma_{jj}^* \cdot t\right). \end{aligned} \quad (\text{D.1})$$

Next, we bound the term (R1.1). After some simple algebra, (R1.1) can be bounded by

$$\begin{aligned} &\mathbb{P}\left(\widehat{\Sigma}_{ij} - \Sigma_{ij}^* > (\varepsilon + \rho_{ij}) \cdot (\Sigma_{ii}^* \Sigma_{jj}^*)^{-1/2} (1-t)^{-1} - \Sigma_{ij}^*\right) \\ &\leq \mathbb{P}\left(\widehat{\Sigma}_{ij} - \Sigma_{ij}^* > \varepsilon (\Sigma_{ii}^* \Sigma_{jj}^*)^{-1/2} (1+t) + t \cdot \Sigma_{ij}^*\right) \end{aligned}$$

Let  $c'_2 = c_1 \min_i (\Sigma_{ii}^*)^2$ , where  $c_1$  is defined in Lemma D.1. If we apply Lemma D.1 with a better constant and Lemma D.2, then for any  $0 \leq \varepsilon \leq t_0 \sqrt{\Sigma_{ii}^* \Sigma_{jj}^*}$ , in which  $t_0$  is defined in Lemma D.1, we must have

$$\begin{aligned} \mathbb{P}\left(\widehat{\rho}_{ij} - \rho_{ij} > \varepsilon\right) &\leq \mathbb{P}\left(\widehat{\Sigma}_{ij} - \Sigma_{ij}^* > \varepsilon (\Sigma_{ii}^* \Sigma_{jj}^*)^{-1/2}\right) + \mathbb{P}\left(\widehat{\Sigma}_{ii} - \Sigma_{ii}^* > t \cdot \Sigma_{ii}^*\right) \\ &\quad + \mathbb{P}\left(\widehat{\Sigma}_{jj} - \Sigma_{jj}^* > t \cdot \Sigma_{jj}^*\right) \\ &\leq 4 \exp\left\{-c'_2 n \cdot \varepsilon^2\right\} + 2 \exp\left\{-n \cdot \frac{1}{2} (t - \log(1+t))\right\}. \end{aligned}$$

Let  $c''_2 = \min\{c'_2, 1/6\}$ . Further, for any  $0 \leq \varepsilon \leq \min\{1/2, t_0 \max_i \Sigma_{ii}^*\}$ , by taking  $t = \varepsilon$  and using the inequality  $t - \log(1+t) \geq 1/3 \cdot t^2$  for all  $t$  such that  $0 \leq t \leq 1/2$ , we obtain

$$\mathbb{P}\left(\widehat{\rho}_{ij} - \rho_{ij} > \varepsilon\right) \leq 4 \exp\left\{-c'_2 \varepsilon^2 \cdot n\right\} + 2 \exp\left\{-\frac{1}{6} \varepsilon^2 \cdot n\right\} \leq 6 \exp\left\{-c''_2 n \cdot \varepsilon^2\right\}.$$

If  $\rho_{ij} < 0$ , in the a similar fashion as before, we can obtain the the following tail probability bound

$$\begin{aligned} \mathbb{P}\left(\widehat{\rho}_{ij} - \rho_{ij} > \varepsilon\right) &\leq \underbrace{\mathbb{P}\left(\widehat{\Sigma}_{ij} - \Sigma_{ij}^* > \varepsilon (\Sigma_{ii}^* \Sigma_{jj}^*)^{-1/2} + \Sigma_{ij}^* \cdot (t^2 - t) - \varepsilon \sqrt{\Sigma_{ii}^* \Sigma_{jj}^*} \cdot t\right)}_{\text{(R1.2)}} \\ &\quad + \mathbb{P}\left(\widehat{\Sigma}_{ii} - \Sigma_{ii}^* > t \cdot \Sigma_{ii}^*\right) + \mathbb{P}\left(\widehat{\Sigma}_{jj} - \Sigma_{jj}^* > t \cdot \Sigma_{jj}^*\right). \end{aligned}$$

To continue, we bound the term (R1.2) in the next. If take  $t = \varepsilon \leq \min\{1/2, t_0 \max_i \Sigma_{ii}^*\} \leq 1/2 + 1/2 |\rho_{ij}|$ , we obtain that  $\Sigma_{ij}^* \cdot (t^2 - t) - \varepsilon \sqrt{\Sigma_{ii}^* \Sigma_{jj}^*} \cdot t \geq -1/2 \sqrt{\Sigma_{ii}^* \Sigma_{jj}^*} \cdot t$ . Thus, we have

$$\begin{aligned} \mathbb{P}\left(\widehat{\rho}_{ij} - \rho_{ij} > \varepsilon\right) &\leq \mathbb{P}\left(\widehat{\Sigma}_{ij} - \Sigma_{ij}^* > \frac{1}{2} \varepsilon (\Sigma_{ii}^* \Sigma_{jj}^*)^{-1/2}\right) + \mathbb{P}\left(\widehat{\Sigma}_{ii} - \Sigma_{ii}^* > t \cdot \Sigma_{ii}^*\right) \\ &\quad + \mathbb{P}\left(\widehat{\Sigma}_{jj} - \Sigma_{jj}^* > t \cdot \Sigma_{jj}^*\right) \\ &\leq 4 \exp\left\{-\frac{1}{4} c'_2 n \cdot \varepsilon^2\right\} + 2 \exp\left\{-\frac{1}{2} n \cdot (\varepsilon - \log(1+\varepsilon))\right\} \\ &\leq 6 \exp\left\{-c_2 n \cdot \varepsilon^2\right\}, \end{aligned}$$

where  $c_2 = \min\{4^{-1} c'_2, 1/6\} = \min\{4^{-1} c_1 \min(\Sigma_{ii}^*)^2, 1/6\} \leq c''_2$ . By combining above two cases, for  $0 \leq \varepsilon \leq \min\{1/2, t_0 \max_i \Sigma_{ii}^*\}$ , we have  $\mathbb{P}(\widehat{\rho}_{ij} - \rho_{ij} > \varepsilon) \leq 6 \exp\{-c_2 n \cdot \varepsilon^2\}$ . In a similar fashion, we obtain the same tail probability bound for  $\widehat{\rho}_{ij} - \rho_{ij} < \varepsilon$ , for  $0 \leq \varepsilon \leq \min\{1/2, t_0 \max_i \Sigma_{ii}^*\}$ . Thus the proof is completed.  $\square$

**Lemma D.4.** Under the same conditions in Lemma (D.3). We have the following result hold

$$\lim_{M \rightarrow \infty} \limsup_n \mathbb{P} \left( \|\nabla \mathcal{L}(\Psi^*)\|_S \max > M \sqrt{\frac{1}{n}} \right) = 0, \quad \text{and} \quad \|\nabla \mathcal{L}(\Psi^*)\|_F = \mathcal{O}_{\mathbb{P}} \left( \sqrt{\frac{s}{n}} \right).$$

*Proof of Lemma D.4.* It is easy to check that  $\|\nabla \mathcal{L}(\Psi^*)\|_S = \|(\widehat{\mathbf{C}} - \mathbf{C}^*)\|_F$ . By applying Lemma D.3 and the union sum bound, for any  $M$  such that  $0 \leq M \leq \min \{1/2, t_0 \max_i \Sigma_{ii}^*\} \cdot \sqrt{n}$ , in which  $t_0$  is defined in Lemma D.3, we obtain

$$\mathbb{P} \left( \|\nabla \mathcal{L}(\Psi^*)\|_S \max > M \sqrt{\frac{1}{n}} \right) \leq s \cdot \exp \{-c_2 M^2\} \leq \exp \{-c_2 M^2 + \log s\}.$$

Taking  $M$  such that  $\sqrt{2c_2^{-1} \log s} \leq M \leq \min \{1/2, t_0 \max_i \Sigma_{ii}^*\} \cdot \sqrt{n}$  and  $M \rightarrow \infty$  in the above inequality obtains us that

$$\lim_{M \rightarrow \infty} \limsup_n \mathbb{P} \left( \|\nabla \mathcal{L}(\Psi^*)\|_S \max > M \sqrt{\frac{1}{n}} \right) = 0,$$

which implies that  $\|\nabla \mathcal{L}(\Psi^*)\|_F = \mathcal{O}_{\mathbb{P}}(\sqrt{s/n})$ . □

**Lemma D.5 (A Concentration Inequality for Sample Correlation Matrix).** Let  $\widehat{\mathbf{C}}, \mathbf{C}^*, \widehat{\rho}_{ij}$  and  $\rho_{ij}^*$  be defined in Lemma D.3. Suppose  $n \geq 3(c_2 t_1^2)^{-1} \cdot \log d$ . Take  $\lambda = \sqrt{3c_2^{-1} \cdot (\log d)/n} \asymp \sqrt{\log(d)/n}$ , in which  $c_2$  is defined as in Lemma D.3. Then  $\widehat{\mathbf{C}}$  must satisfy

$$\mathbb{P} \left( \|\widehat{\mathbf{C}} - \mathbf{C}^*\|_{\max} \leq \lambda \right) \leq 1 - 8/d.$$

*Proof.* It is easy to check that  $\nabla \mathcal{L}(\mathbf{C}^*) = \widehat{\mathbf{C}} - \mathbf{C}^*$ . Therefore, applying Lemma D.3 and union sum bound, we obtain that, for any  $\lambda \leq t_1 \equiv \min \{1/2, t_0 \max_i \{\Sigma_{ii}^*\}\}$  with  $t_0$  defined in Lemma D.1,

$$\mathbb{P} \left( \|\widehat{\mathbf{C}} - \mathbf{C}^*\|_{\max} > \lambda \right) \leq 6d^2 \cdot \exp\{-c_2 n \lambda^2\}.$$

where  $c_2 = \min\{4^{-1}c_1 \min(\Sigma_{ii}^*)^2, 1/6\}$ , in which  $c_1$  is defined in Lemma D.1. , for  $n$  sufficiently large such that  $n \geq 3(c_2 t_1^2)^{-1} \cdot \log d$ , by taking  $\lambda = \sqrt{3c_2^{-1} \cdot (\log d)/n} \leq t_1$ , we obtain  $\mathbb{P}(\|\widehat{\mathbf{C}} - \mathbf{C}^*\|_{\max} \leq \lambda) = 1 - \mathbb{P}(\|\widehat{\mathbf{C}} - \mathbf{C}^*\|_{\max} > \lambda) \geq 1 - 6d^2 \cdot \exp\{-c_2 n \lambda^2\} \geq 1 - 8/d$ . The proof is completed. □

**Lemma D.6.** Under the same conditions in Lemma D.5, we have

$$\lim_{M \rightarrow \infty} \limsup_n \mathbb{P} \left( \|\widehat{\mathbf{C}} - \mathbf{C}^*\|_S \max > M \sqrt{\frac{1}{n}} \right) = 0, \quad \text{and} \quad \|(\widehat{\mathbf{C}} - \mathbf{C}^*)\|_S \max = \mathcal{O}_{\mathbb{P}} \left( \sqrt{\frac{1}{n}} \right).$$

*Proof of Lemma D.6.* The proof is similar to that of Lemma D.5 and thus is omitted. □

## E. Preliminary Lemmas

In this section we state and prove the technical lemmas used in previous sections. The following lemma establishes the tail bound type of the product of two sub-Gaussian random variables. Let  $\|\cdot\|_{\psi_1}$  and  $\|\cdot\|_{\psi_2}$  be the  $\psi_1$ - and  $\psi_2$ -norm defined in (Vershynin, 2010).

**Lemma E.1.** For  $X$  and  $Y$  being two sub-Gaussian random variables, then the absolute value of their product  $|X \cdot Y|$  is a sub-exponential random variable with

$$\|X \cdot Y\|_{\psi_1} \leq 2 \cdot \|X\|_{\psi_2} \|Y\|_{\psi_2}.$$

*Proof of Lemma E.1.* To show  $X \cdot Y$  is sub-exponential, it suffices to prove that the  $\psi_1$ -norm of  $X \cdot Y$  is bounded. By the definition of the  $\psi_1$ -norm, we have

$$\|X \cdot Y\|_{\psi_1} = \sup_{p \geq 1} p^{-1} [\mathbb{E}|X \cdot Y|^p]^{1/p}. \quad (\text{E.1})$$

We need to use the Hölder inequality as follows

$$\mathbb{E}[|\langle f, g \rangle|] \leq [\mathbb{E}|f|^r]^{1/r} [\mathbb{E}|g|^s]^{1/s}, \quad \frac{1}{r} + \frac{1}{s} = 1,$$

where  $f$  and  $g$  are two random functions. If we choose  $f = X^p$ ,  $g = Y^p$  and  $r = s = 2$  in the Hölder inequality, then the right hand side of (E.1) can be bounded by

$$\begin{aligned} & \sup_{p \geq 1} \left\{ p^{-1} [\mathbb{E}|X|^{2p}]^{1/(2p)} [\mathbb{E}|Y|^{2p}]^{1/(2p)} \right\} \\ & \leq 2 \sup_{p \geq 1} \left\{ (2p)^{-1/2} [\mathbb{E}|X|^{2p}]^{1/(2p)} \right\} \cdot \sup_{p \geq 1} \left\{ (2p)^{-1/2} [\mathbb{E}|Y|^{2p}]^{1/(2p)} \right\}. \end{aligned}$$

Therefore we obtain that  $\|X \cdot Y\|_{\psi_1} \leq 2\|X\|_{\psi_2}\|Y\|_{\psi_2} < \infty$ . The proof is completed.  $\square$

**Lemma E.2.** Let  $D_{\mathcal{L}}(\Theta_1, \Theta_2) = \mathcal{L}(\Theta_1) - \mathcal{L}(\Theta_2) - \langle \mathcal{L}(\Theta_2), \Theta_1 - \Theta_2 \rangle$  and  $D_{\mathcal{L}}^s(\Theta_1, \Theta_2) = D_{\mathcal{L}}(\Theta_1, \Theta_2) + D_{\mathcal{L}}(\Theta_2, \Theta_1)$ . For  $\Theta(t) = \Theta^* + t(\Theta - \Theta^*)$  with  $t \in (0, 1]$ , we have that

$$D_{\mathcal{L}}^s(\Theta(t), \Theta^*) \leq tD_{\mathcal{L}}^s(\Theta, \Theta^*).$$

*Proof of Lemma E.2.* Let  $Q(t) = D_{\mathcal{L}}(\Theta(t), \Theta^*) = \mathcal{L}(\Theta(t)) - \mathcal{L}(\Theta^*) - \langle \nabla \mathcal{L}(\Theta^*), \Theta(t) - \Theta^* \rangle$ . Since the derivative of  $\mathcal{L}(\Theta(t))$  with respect to  $t$  is  $\langle \nabla \mathcal{L}(\Theta(t)), \Theta - \Theta^* \rangle$ , then the derivative of  $Q(t)$  is

$$Q'(t) = \langle \nabla \mathcal{L}(\Theta(t)) - \nabla \mathcal{L}(\Theta^*), \Theta - \Theta^* \rangle.$$

Therefore the Bregman divergence  $D_{\mathcal{L}}^s(\Theta(t) - \Theta^*)$  can written as

$$D_{\mathcal{L}}^s(\tilde{\Theta}(t) - \Theta^*) = \langle \nabla \mathcal{L}(\tilde{\Theta}(t)) - \nabla \mathcal{L}(\Theta^*), t(\Theta - \Theta^*) \rangle = tQ'(t) \text{ for } 0 < t \leq 1.$$

By plugging  $t = 1$  in the above function equation, we have  $Q'(1) = D_{\mathcal{L}}^s(\Theta, \Theta^*)$  as a special case. If we assume that  $Q(t)$  is convex, then  $Q'(t)$  is non-decreasing and thus

$$D_{\mathcal{L}}^s(\Theta(t), \Theta^*) = tQ'(t) \leq tQ'(1) = tD_{\mathcal{L}}^s(\Theta, \Theta^*).$$

Therefore the proof is completed. It remains to prove that  $Q(t)$  is a convex function, i.e.

$$Q(\alpha_1 t_1 + \alpha_2 t_2) \leq \alpha_1 Q(t_1) + \alpha_2 Q(t_2), \forall t_1, t_2 \in (0, 1], \alpha_1, \alpha_2 \geq 0 \text{ s.t. } \alpha_1 + \alpha_2 = 1. \quad (\text{E.2})$$

For  $\forall \alpha_1, \alpha_2 \geq 0$  such that  $\alpha_1 + \alpha_2 = 1$ , and  $t_1, t_2 \in (0, 1)$ , we have  $\Theta(\alpha_1 t_1 + \alpha_2 t_2) = \alpha_1 \Theta(t_1) + \alpha_2 \Theta(t_2)$ . By the bi-linearity property of the inner product function  $\langle \cdot, \cdot \rangle$ , and using the linearity property of  $\Theta(\cdot)$ , we have the following equality hold

$$\begin{aligned} & - \langle \nabla \mathcal{L}(\Theta^*), \Theta(\alpha_1 t_1 + \alpha_2 t_2) - \Theta^* \rangle \\ & = -\alpha_1 \langle \nabla \mathcal{L}(\Theta^*), \Theta(t_1) - \Theta^* \rangle - \alpha_2 \langle \nabla \mathcal{L}(\Theta^*), \Theta(t_2) - \Theta^* \rangle. \end{aligned} \quad (\text{E.3})$$

On the other side, by the convexity of the loss function  $\mathcal{L}(\cdot)$ , we obtain

$$\mathcal{L}(\Theta(\alpha_1 t_1 + \alpha_2 t_2)) = \mathcal{L}(\alpha_1 \Theta(t_1) + \alpha_2 \Theta(t_2)) \leq \alpha_1 \mathcal{L}(\Theta(t_1)) + \alpha_2 \mathcal{L}(\Theta(t_2)). \quad (\text{E.4})$$

By adding (E.3) and (E.4) together and using the definition of function  $Q(\cdot)$ , we obtain

$$Q(\alpha_1 t_1 + \alpha_2 t_2) \leq \alpha_1 Q(t_1) + \alpha_2 Q(t_2),$$

which indicates  $Q(t)$  is a convex function. Thus we complete our proof.  $\square$

**Lemma E.3.** Let  $\mathbf{A}_i, \mathbf{B}_i \in \mathbb{R}^{d \times d}$  be square matrices for  $i = 1, 2$ . Then we have

$$\begin{aligned} \mathbf{A}_1 \mathbf{B}_1 \mathbf{A}_1 - \mathbf{A}_2 \mathbf{B}_2 \mathbf{A}_2 &= (\mathbf{A}_1 - \mathbf{A}_2)(\mathbf{B}_1 - \mathbf{B}_2)(\mathbf{A}_1 - \mathbf{A}_2) + (\mathbf{A}_1 - \mathbf{A}_2) \mathbf{B}_2 \mathbf{A}_2 \\ &\quad + (\mathbf{A}_1 - \mathbf{A}_2) \mathbf{B}_2 \mathbf{A}_1 + \mathbf{A}_1 (\mathbf{B}_1 - \mathbf{B}_2) \mathbf{A}_2. \end{aligned}$$

The next lemma characterizes an upper bound of  $\|\mathbf{A}^{-1} - \mathbf{B}^{-1}\|_*$  in terms of  $\|\mathbf{A} - \mathbf{B}\|_*$ , where  $\|\cdot\|_*$  is any matrix norm.

**Lemma E.4.** Let  $\mathbf{A}, \mathbf{B} \in \mathbb{R}^{d \times d}$  be invertible. For any matrix norm  $\|\cdot\|_*$ , we have

$$\|\mathbf{A}^{-1} - \mathbf{B}^{-1}\|_* \leq \frac{\|\mathbf{A}^{-1}\|_*^2 \|\mathbf{A} - \mathbf{B}\|_*}{1 - \|\mathbf{A}^{-1}\|_* \|\mathbf{A} - \mathbf{B}\|_*}.$$

We need the following lemma for bounding the difference with respect to the Kronecker product.

**Lemma E.5.** Let  $\mathbf{A}$  and  $\mathbf{B}$  be matrices of the same dimension. Then we have

$$\begin{aligned} \|\mathbf{A} \otimes \mathbf{B}\|_\infty &= \|\mathbf{A}\|_\infty \|\mathbf{B}\|_\infty, \quad \text{and} \\ \|\mathbf{A} \otimes \mathbf{A} - \mathbf{B} \otimes \mathbf{B}\|_\infty &\leq \|\mathbf{A} - \mathbf{B}\|_\infty^2 + 2 \min\{\|\mathbf{A}\|_\infty, \|\mathbf{B}\|_\infty\} \|\mathbf{A} - \mathbf{B}\|_\infty. \end{aligned}$$

The proof of the above lemma can be carried out by using the definitions and thus is omitted here for simplicity.

For a matrix  $\mathbf{A} = (a_{ij})$ , we say  $\mathbf{A}_{\text{ad}} = (a_{ij}^{\text{ad}})$  is the corresponding sparsity pattern matrix if  $a_{ij}^{\text{ad}} = 1$  when  $a_{ij} \neq 0$ ; and  $a_{ij}^{\text{ad}} = 0$ , otherwise.

**Lemma E.6.** Let  $\mathbf{A} \in \mathbb{R}^{d \times d}$  be a matrix such that  $\|\mathbf{A}\|_{\max} \leq 1$ . Let  $\mathbf{A}_{\text{ad}}$  be the corresponding sparsity pattern matrix. Then we have

$$\|\mathbf{A}\|_2 \leq \|\mathbf{A}_{\text{ad}}\|_2.$$

*Proof of Lemma E.6.* Let  $a_{ij}$  be the  $(i, j)$ -th entry of matrix  $\mathbf{A}$  and  $x_j$  the  $j$ -th entry of  $\mathbf{x}$ . Following the definition of the spectral norm of a matrix, we obtain that

$$\begin{aligned} \|\mathbf{A}\|_2 &= \sup_{\|\mathbf{x}\|_2=1} \|\mathbf{A}\mathbf{x}\|_2 = \sup_{\|\mathbf{x}\|_2=1} \left\{ \sum_{i=1}^n \left( \sum_{j=1}^n a_{ij} x_j \right)^2 \right\} \\ &\leq \sup_{\|\mathbf{x}\|_2=1} \left\{ \sum_{i=1}^n \left( \sum_{j=1}^n \text{sgn}(x_j) 1(a_{ij} \neq 0) \cdot x_j \right)^2 \right\} \\ &= \sup_{\mathbf{x} \geq 0, \|\mathbf{x}\|_2=1} \left\{ \sum_{i=1}^n \left( \sum_{j=1}^n 1(a_{ij} \neq 0) \cdot x_j \right)^2 \right\} \leq \|\mathbf{A}_{\text{ad}}\|_2. \end{aligned}$$

Thus the proof is completed.  $\square$

**Lemma E.7.** Let  $\widehat{\mathbf{A}} \in \mathbb{R}^{d \times d}$  be a semi-positive definite random matrix,  $\mathbf{A} \in \mathbb{R}^{d \times d}$  a positive definite deterministic matrix. Then we have

$$\mathbb{P}\left(\|\widehat{\mathbf{A}}^{-1} - \mathbf{A}^{-1}\|_2 > 2\lambda_{\min}^{-2}(\mathbf{A}) \cdot \|\widehat{\mathbf{A}} - \mathbf{A}\|_2\right) \leq \mathbb{P}\left(\|\widehat{\mathbf{A}} - \mathbf{A}\|_2 > 2^{-1}\lambda_{\min}(\mathbf{A})\right).$$

If we further assume that  $\widehat{\mathbf{A}}$  and  $\mathbf{A}$  are commutative, that is  $\widehat{\mathbf{A}}\mathbf{A} = \mathbf{A}\widehat{\mathbf{A}}$ , then we have

$$\begin{aligned} \mathbb{P}\left(\|\widehat{\mathbf{A}}^{-1/2} - \mathbf{A}^{-1/2}\|_2 > 2(\sqrt{2} + 1)\|\mathbf{A}\|_2^{1/2}\lambda_{\min}^{-2}(\mathbf{A})\|\widehat{\mathbf{A}} - \mathbf{A}\|_2\right) \\ \leq \mathbb{P}\left(\|\widehat{\mathbf{A}} - \mathbf{A}\|_2 > 2^{-1}\lambda_{\min}(\mathbf{A})\right). \end{aligned}$$



*Proof of Lemma E.7.* We first write  $\widehat{\mathbf{A}}^{-1} - \mathbf{A}^{-1}$  as  $\widehat{\mathbf{A}}^{-1}(\widehat{\mathbf{A}} - \mathbf{A})\mathbf{A}^{-1}$ , then it follows from the sub-multiplicative property of the spectral norm that

$$\begin{aligned} \|\widehat{\mathbf{A}}^{-1} - \mathbf{A}^{-1}\|_2 &\leq \|\widehat{\mathbf{A}}^{-1}(\widehat{\mathbf{A}} - \mathbf{A})\mathbf{A}^{-1}\|_2 \leq \|\widehat{\mathbf{A}}^{-1}\|_2 \|\mathbf{A}^{-1}\|_2 \|\widehat{\mathbf{A}} - \mathbf{A}\|_2 \\ &\leq \lambda_{\min}^{-1}(\widehat{\mathbf{A}}) \lambda_{\min}^{-1}(\mathbf{A}) \cdot \|\widehat{\mathbf{A}} - \mathbf{A}\|_2. \end{aligned} \quad (\text{E.5})$$

By Weyl's inequality, we obtain that  $\lambda_{\min}(\mathbf{A}) \leq \lambda_{\min}(\widehat{\mathbf{A}}) + \|\widehat{\mathbf{A}} - \mathbf{A}\|_2$ , and thus  $\lambda_{\min}(\widehat{\mathbf{A}}) \geq \lambda_{\min}(\mathbf{A}) - \|\widehat{\mathbf{A}} - \mathbf{A}\|_2$ . Thus in the event of  $\{\|\widehat{\mathbf{A}} - \mathbf{A}\|_2 \leq 2^{-1}\lambda_{\min}(\mathbf{A})\}$ , we have  $\lambda_{\min}(\widehat{\mathbf{A}}) \geq 2^{-1}\lambda_{\min}(\mathbf{A})$  hold. Thus it follows from (E.5) that

$$\mathbb{P}\left(\|\widehat{\mathbf{A}}^{-1} - \mathbf{A}^{-1}\|_2 \leq 2\lambda_{\min}^{-2}(\mathbf{A}) \cdot \|\widehat{\mathbf{A}} - \mathbf{A}\|_2\right) \geq \mathbb{P}\left(\|\widehat{\mathbf{A}} - \mathbf{A}\|_2 \leq 2^{-1}\lambda_{\min}(\mathbf{A})\right).$$

This proves the first desired probability bound. If we further assume that  $\widehat{\mathbf{A}}$  and  $\mathbf{A}$  are commutative, under the event  $\{\|\widehat{\mathbf{A}} - \mathbf{A}\|_2 \leq 2^{-1}\lambda_{\min}(\mathbf{A})\}$ , we have

$$\begin{aligned} \|\widehat{\mathbf{A}}^{-1/2} - \mathbf{A}^{-1/2}\|_2 &= \|(\widehat{\mathbf{A}}^{-1/2} + \mathbf{A}^{-1/2})^{-1}(\widehat{\mathbf{A}}^{-1} - \mathbf{A}^{-1})\|_2 \\ &\leq \left(\|\widehat{\mathbf{A}}\|_2^{1/2} + \|\mathbf{A}\|_2^{1/2}\right) \|\widehat{\mathbf{A}}^{-1} - \mathbf{A}^{-1}\|_2 \\ &\leq (\sqrt{2} + 1) \|\mathbf{A}\|_2^{1/2} \|\widehat{\mathbf{A}}^{-1} - \mathbf{A}^{-1}\|_2 \\ &\leq 2(\sqrt{2} + 1) \|\mathbf{A}\|_2^{1/2} \lambda_{\min}^{-2}(\mathbf{A}) \|\widehat{\mathbf{A}} - \mathbf{A}\|_2. \end{aligned}$$

Therefore we prove the third result. □

The following lemma is taken from (Dembo and Zeitouni, 2009), which leads to a concentration bound of the empirical means  $\bar{X} = n^{-1} \sum_{i=1}^n X_i$ , where  $X_i$ 's are i.i.d. random copies of  $X$ . Define the logarithmic moment generating function associated with  $X$  to be

$$\Lambda_X(\lambda) \equiv \log M_X(\lambda) = \log \mathbb{E}[\exp\{\lambda X\}]. \quad (\text{E.6})$$

**Lemma E.8 (Large Deviation Inequality).** Let the logarithmic moment generating function of  $X$ ,  $\Lambda_X(\lambda)$ , be defined in E.6. Define the Fenchel-Legendre dual of  $\Lambda_X(x)$  to be  $\Lambda_X^*(x) \equiv \sup_{\lambda \in \mathbb{R}} \{\lambda x - \Lambda(\lambda)\}$ . Then, for any  $t \geq 0$ , we have

$$\begin{aligned} \mathbb{P}\left(\frac{1}{n} \sum_{i=1}^n X_i - \mathbb{E}X \geq t\right) &\leq \exp\left\{-n(\mathbb{E}X + \inf_{x \in F_1} \Lambda^*(x))\right\} \text{ and} \\ \mathbb{P}\left(\frac{1}{n} \sum_{i=1}^n X_i - \mathbb{E}X \leq -t\right) &\leq \exp\left\{-n(\mathbb{E}X + \inf_{x \in F_2} \Lambda^*(x))\right\}, \end{aligned}$$

where  $F_1 = [t, +\infty)$  and  $F_2 = (-\infty, -t]$ .

## References

- Bickel, P. J. and Levina, E. (2008), "Regularized estimation of large covariance matrices," *The Annals of Statistics*, 36, 199–227.
- Dembo, A. and Zeitouni, O. (2009), *Large deviations techniques and applications*, vol. 38, Springer Science & Business Media.
- Horn, R. A. and Johnson, C. R. (2012), *Matrix analysis*, Cambridge university press.
- Liu, H., Han, F., Yuan, M., Lafferty, J., Wasserman, L., et al. (2012), "High-dimensional semiparametric Gaussian copula graphical models," *The Annals of Statistics*, 40, 2293–2326.
- Vershynin, R. (2010), "Introduction to the non-asymptotic analysis of random matrices," *arXiv preprint arXiv:1011.3027*.
